Manuscript

1 Higher-order thalamocortical inputs gate synaptic long-term potentiation  
2 via disinhibition

3

4 Leena E. Williams<sup>1</sup> and \*Anthony Holtmaat<sup>1</sup>

5 <sup>1</sup>Department of Basic Neurosciences and the Center for Neuroscience, Faculty of Medicine,  
6 University of Geneva, 1 rue Michel Servet, Geneva, Switzerland 1206

7

8

9

10

11 Lead Contact & Corresponding Author: \*Anthony Holtmaat (Anthony.Holtmaat@unige.ch)

12

13 Number of pages in manuscript (including references and figure legends): 33

14

15 Number of figures: 5

16 Number of Supplementary figures: 5

17

18 Number of words: Abstract: 150, Main text: 4334, STAR Methods: 2294.

19 Number of characters with spaces (title, abstract, main figure, legends and references):

20 49,110.

21

22

23

24 **SUMMARY**

25 Sensory experience and perceptual learning changes the receptive field properties of  
26 cortical pyramidal neurons, largely mediated by long-term potentiation (LTP) of synapses.  
27 The circuit mechanisms underlying cortical LTP remain unclear. In the mouse  
28 somatosensory cortex (S1), LTP can be elicited in layer (L) 2/3 pyramidal neurons by  
29 rhythmic whisker stimulation. We combined electrophysiology, optogenetics, and  
30 chemogenetics in thalamocortical slices to dissect the synaptic circuitry underlying this  
31 LTP. We found that projections from higher-order, posteromedial thalamic complex (POm)  
32 to S1 are key to eliciting NMDAR-dependent LTP of intracortical synapses. Paired  
33 activation of intracortical and higher-order thalamocortical pathways increased vasoactive  
34 intestinal peptide (VIP) interneuron and decreased somatostatin (SST) interneuron activity,  
35 which was critical for inducing LTP. Our results reveal a novel circuit motif in which higher-  
36 order thalamic feedback gates plasticity of intracortical synapses in S1 via disinhibition.  
37 This motif may allow contextual feedback to shape synaptic circuits that process first-order  
38 sensory information.

39

40 **KEY WORDS (10)**

41 Plasticity, Long term potentiation (LTP), thalamocortical, thalamus, somatosensory, Barrel  
42 Cortex, disinhibition, Posterior Medial Complex of the Thalamus (POm), Somatostatin-  
43 expressing interneurons (SSTs), Vasoactive intestinal peptide-expressing (VIPs).

44

45 **INTRODUCTION**

46 Sensory experience and perceptual learning can remodel neocortical synaptic circuits  
47 throughout life (Feldman, 2009). The long-term potentiation and depression of synapses  
48 (LTP and LTD, respectively) constitutes a fundamental underpinning of functional cortical  
49 synaptic circuit plasticity (Bliss and Collingridge, 1993; Sjöström et al., 2008; Feldman,  
50 2009; Froemke, 2015). However, the circuit mechanisms of cortical LTP and LTD remain  
51 unclear. In particular, the interactions of long-range feedback projections with local cortical  
52 microcircuits, and the role thereof in local cortical plasticity have been poorly investigated.

53

54 The mouse somatosensory cortex (S1) serves as an important model for LTP and LTD,  
55 largely owing to the one-to-one anatomical relationship between individual sensory organs  
56 (whiskers) and the cortical columns (Feldman, 2009). Hence, it is relatively easy to perform  
57 targeted recordings, as well as to selectively enhance or decrease sensory input. First-

58 order, whisker sensory information passes to S1 through the ventroposterior medial (VPM)  
59 thalamus which projects onto layer (L) 4 and L5b, representing the lemniscal pathway  
60 (**Figures 1A,B**) (Feldmeyer, 2012). L4 and L5b neurons in turn synapse, among others,  
61 onto L2/3 pyramidal neurons (Lefort et al., 2009; Petreanu et al., 2009; Feldmeyer, 2012).  
62 Higher-order thalamocortical feedback from the posteromedial thalamic complex (POm)  
63 joins ascending sensory input to S1 and projects onto L2/3 and L5a neurons, representing  
64 the paralemniscal pathway (Bureau et al., 2006; Petreanu et al., 2009; Feldmeyer, 2012;  
65 Jouhanneau et al., 2014). Therefore, both lemniscal inputs (via L4) and paralemniscal  
66 inputs (via direct POm projections) arrive at L2/3 pyramidal neurons. L2/3 pyramidal  
67 neurons are inhibited by a variety of interneurons. In particular, their distal dendrites are  
68 strongly inhibited by somatostatin (SST)-expressing interneurons (Wang et al., 2004;  
69 Gentet et al., 2012), which, in turn, are inhibited by vasoactive intestinal peptide (VIP)-  
70 expressing interneurons (Pfeffer et al., 2013; Lee et al., 2013). The lemniscal (L4) and  
71 paralemniscal (POm) pathways provide direct and indirect input to both interneuron types  
72 (Wall et al., 2016; Audette et al., 2017).

73

74 In our laboratory it was previously demonstrated that cortical L2/3 pyramidal neurons in S1  
75 undergo post-synaptic LTP following a brief period (1min) of rhythmic whisker stimulation  
76 (RWS) (Gambino et al., 2014). This form of LTP does not rely on back-propagating action  
77 potentials (bAPs), but is driven by long-lasting N-methyl-D-aspartate receptor (NMDAR)-  
78 mediated potentials that are dependent on the activity of the POm. This suggests that  
79 lemniscal as well as paralemniscal activity is necessary to induce LTP. However, it remains  
80 unclear if co-activity of the POm and L4 alone is sufficient to drive LTP in L2/3 pyramidal  
81 neurons, and what, exactly, are the underlying microcircuits within S1 that mediate this  
82 LTP.

83

84 Here we aimed at dissecting the circuit underpinnings of this type of plasticity in  
85 thalamocortical slices by isolating the synaptic inputs that we suspected are driving the  
86 RWS-evoked LTP in L2/3 pyramidal neurons *in vivo*. We paired optogenetic stimulation of  
87 POm afferents and electrical stimulation of L4 over the same time-course and at the same  
88 frequency (1min, 8Hz) as LTP-evoking RWS *in vivo*. We demonstrate that this rhythmic  
89 paired stimulation (RPS) of POm-originating and L4-originating pathways can drive LTP of  
90 L2/3 pyramidal neuron excitatory synapses. This type of LTP is occluded by prior RWS *in*  
91 *vivo*. Furthermore, we show that the POm provides direct inputs onto VIP interneurons.

92 The paired stimulation (PS) of L4 and the POm increases their activity, whereas it reduces  
93 SST interneuron activity, causing a disinhibition of L2/3 pyramidal neurons. Finally, we  
94 found that both direct POm input to L2/3 pyramidal neurons and the disinhibition are  
95 necessary to drive LTP.

96

97 Altogether, this study shows a form of LTP in S1 that is mechanistically linked to sensory-  
98 driven plasticity. It is dependent on the co-activation of intracortical connections along with  
99 higher-order thalamocortical feedback input and is gated by local VIP-mediated  
100 disinhibition, revealing a powerful circuit motif for cortical plasticity.

101

## 102 RESULTS

### 103 Higher-order POm thalamic inputs are indispensable for LTP of intracortical 104 synapses on L2/3 pyramidal neurons

105 To test if RPS of L4 and the POm can drive synaptic LTP we recorded intracellular  
106 responses from L2/3 pyramidal neurons in thalamocortical slices while pairing electrical  
107 stimuli (ES) of L4 with optical stimuli (OS) of POm afferents expressing the light-gated ion  
108 channel channelrhodopsin-2 (ChR2) at 8Hz for 1 minute (**Figures 1A,B**) (Zhang et al.,  
109 2006). ChR2 was expressed in POm neurons using targeted injections of recombinant  
110 adeno-associated viral vectors (AAV) encoding ChR2 under the CMV promoter. Successful  
111 injections could be identified by virtue of a robust expression of ChR2-tdTomato in POm  
112 neurons, as well as by the distinct expression pattern in the barrel cortex of S1, where  
113 dense projections could be observed in L1 and L5 and not in L4 (**Figures 1A,C**;  
114 **Supplementary Figure 1**) (Wimmer et al., 2010). Typical spiking patterns induced by  
115 current steps identified L2/3 pyramidal neurons (**Figure 1D**) (Avermann et al., 2012).

116

117 A single electrical stimulation pulse in L4 (L4-ES, 0.2ms) evoked a depolarizing  
118 postsynaptic potential (PSP) in L2/3 pyramidal neurons, incidentally followed by a  
119 hyperpolarizing overshoot (**Figure 1D**). The latter component was eliminated by blocking  
120 of  $\gamma$ -aminobutyric acid receptors (GABARs) using bath application of picrotoxin (Ptx,  
121 100 $\mu$ M, specifically GABA<sub>A</sub>R). Optical stimulation of ChR2-expressing POm projections  
122 (POm-OS, 5ms pulse) consistently evoked a depolarizing PSP (**Figure 1D**). Bath  
123 application of Ptx had no effect on the POm-evoked PSP. Bath application of 2,3-dihydroxy-  
124 6-nitro-7-sulfamoyl-benzo[f]quinoxaline-2,3-dione (NBQX, 10 $\mu$ M) completely eliminated the

125 L4 and POM-evoked PSPs, indicating dependence on  $\alpha$ -amino-3-hydroxy-5-methyl-4-  
126 isoxazolepropionic acid receptors (AMPA receptors, **Figure 1D**).

127

128 We performed rhythmic paired stimulation (RPS) of L4 and POM (8Hz, 1min) and  
129 measured both L4 and POM-evoked PSP amplitudes pre and post pairing (**Figure 1E**).

130 RPS significantly increased mean L4-evoked PSP amplitudes (**Figure 1F,G**). Mean POM-  
131 evoked PSP amplitudes were not significantly potentiated (**Figure 1H,I**), which  
132 demonstrates that the LTP is expressed on intracortical and not on thalamocortical  
133 synapses.

134

135 To determine whether activity of POM afferents is necessary for RPS-driven LTP we  
136 repeated the RPS experiment with both ChR2 and hM4Di (inhibitory Designer Drugs  
137 Exclusively for Designer Receptors, DREADDs) receptors present in the POM (**Figure 1J**)  
138 (Armbruster et al., 2007). The hM4Di receptors were activated by bath application of the  
139 synthetic agonist clozapine-N-oxide (CNO, 500nM), which diminished the likelihood of  
140 eliciting a POM-evoked PSP (59% increase in failure rate; **Figure 1K**) (Stachniak et al.,  
141 2014). Under these conditions RPS did not elicit significant LTP (**Figure 1L-M**). This effect  
142 was also not attributable to the CNO itself, since the presence of CNO did not prevent RPS-  
143 driven LTP in slices that lacked hM4Di expression (**Figure 1L,N**). This suggests that  
144 reduced POM activity prevents LTP, which is consistent with previous findings *in vivo*  
145 (Gambino et al., 2014). To corroborate these findings we tested the effect of L4 rhythmic  
146 electrical stimulation only (L4-RES, 8Hz, 1min; **Supplementary Figure 1**). Mean L4-  
147 evoked PSP amplitudes were not significantly increased (**Supplementary Figure 1**).  
148 Nonetheless, in 4 out of 7 cells L4-RES induced a significant LTP. These data suggest that  
149 L4-RES alone is able to induce LTP in some cells. L4-ES may, however, variably recruit  
150 POM ascending fibers passing through L4. Therefore, to eliminate any residual contribution  
151 of POM-derived inputs in the L4-RES paradigm, we repeated the experiment using hM4Di  
152 expression in the POM. Upon silencing of POM afferents, L4-RES failed to increase the  
153 mean L4-evoked PSP amplitudes (**Supplementary Figure 1**). Normalized L4-evoked  
154 PSP amplitudes were significantly larger after the L4-RES protocol as compared to L4-RES  
155 with POM inhibition (**Supplementary Figure 1**). None of the suppressed LTP effects  
156 above were attributable to a change in baseline L4 or POM PSP amplitudes as across  
157 experiments baseline PSP size was not correlated with LTP size; nor was there a  
158 correlation between LTP size and various electrophysiological parameters

159 **(Supplementary Figure 1)**. Together, the data strongly suggests that the activity of  
160 POM inputs is required to drive LTP.

161

162 We observed no spikes upon RPS or L4-RES. Thus, similar to *in vivo* experiments, the LTP  
163 occurs in the absence of bAPs, and instead could have been caused by long-lasting  
164 subthreshold depolarization (Gambino et al., 2014). Indeed, we found an increase in  
165 cumulative PSP amplitudes upon RPS as compared to L4-RES with the POM inhibited  
166 **(Supplementary Figure 1)**. The amplitude of the 1<sup>st</sup> PSP upon the repeated pairing,  
167 which is a measure of the increased depolarization was, however, predictive of the size of  
168 the LTP **(Supplementary Figure 1)**.

169

170 Altogether, these data indicate that the activation of POM-derived paralemniscal circuitry is  
171 necessary to increase the depolarization of L2/3 pyramidal neurons during the rhythmic  
172 stimulation and to potentiate the synapses from intracortical circuits **(Figure 1G,I,M,N**  
173 **Supplementary Figure 1)**. Hence, in all of the following experiments we used RPS-  
174 driven LTP to investigate the cellular and circuit underpinnings.

175

#### 176 **RPS-evoked LTP is NMDA-dependent and shares expression mechanisms** 177 **with whisker stimulation-evoked LTP *in vivo***

178 We next used pharmacology to investigate the mechanisms underlying this LTP. Blocking  
179 of GABARs with picrotoxin (Ptx, 100 $\mu$ M) induced a robust LTP in all cells **(Figure 2A,B)**.  
180 L4-evoked PSP amplitudes did not increase without RPS **(Figure 2E)**, excluding the  
181 possibility that the observed LTP under GABAR block was caused by a ramping up of  
182 baseline responses. When the NMDAR blocker (2R)-amino-5-phosphonovaleric acid (APV,  
183 50 $\mu$ M) was added LTP could not be elicited **(Figure 2C-E)**. These data indicate that the  
184 LTP occurs at excitatory synapses, is NMDAR-dependent, and is not attributable to  
185 inhibitory plasticity.

186

187 Similar to the silencing of POM inputs, the NMDAR block reduced PSP amplitudes at the  
188 start of the RPS period and significantly impaired the cumulative depolarization  
189 **(Supplementary Figure 2)**. This is consistent with the *in vivo* observation that POM  
190 inputs promote LTP through facilitation of NMDAR-mediated conductances.

191

192 We hypothesized that if RPS-driven LTP shares its underlying mechanisms with RWS  
193 (rhythmic whisker stimulation)-driven plasticity *in vivo*, RWS would occlude subsequent  
194 RPS-driven potentiation in slices from these mice. To test this we rhythmically stimulated all  
195 the whiskers with piezoelectric actuators (8 Hz, 10min), a protocol known to induce a robust  
196 increase in whisker-evoked cortical local field potentials and LTP (Gambino et al., 2014;  
197 Mégevand et al., 2009). This was followed by immediate slice preparation and RPS  
198 (RPS<sub>RWS</sub>; **Figure 2F**).

199

200 We found that RPS failed to induce LTP in slices of mice that had undergone prior RWS  
201 (**Figure 2F-H**). Similarly, RPS-driven LTP in slices followed by a 2<sup>nd</sup> RPS could not elicit  
202 further LTP (**Supplementary Figure 2**).

203

204 RWS prior to slicing did not diminish baseline L4-evoked PSP amplitudes, or cumulative  
205 PSP amplitudes during RPS<sub>RWS</sub> (**Supplementary Figure 2**), indicating that the lack of  
206 LTP was not due to diminished depolarization, but rather was an effect of occluded  
207 expression. This was similarly observed for the repeated RPS slice experiment. Altogether,  
208 these results suggest that the paired stimulation of L4 and POm pathways *ex vivo* results in  
209 an LTP of the same synapses that are potentiated by RWS *in vivo*, and implies that the  
210 same synaptic circuits are recruited by repeated sensory stimuli.

211

### 212 **Paired POm thalamic and L4 cortical inputs engage a disinhibitory** 213 **microcircuit motif**

214 We next questioned whether the excitatory inputs from L4 and POm onto L2/3 pyramidal  
215 neurons are sufficient to induce LTP, or whether local disinhibition is also required. We  
216 focused on SST and VIP interneurons. They constitute a well-characterized disinhibitory  
217 microcircuit for L2/3 pyramidal cell apical dendrites, which is the location of POm inputs  
218 (Wang et al., 2004; Gentet et al., 2012; Pfeffer et al., 2013; Lee et al., 2013). We recorded  
219 from these interneurons to determine if they are activated by POm-OS and/or L4-ES, and to  
220 measure the effect of paired stimulation (PS) (**Figure 3**).

221

222 We used VIP-Cre and SST-Cre mice in combination with Cre-dependent AAV viral vectors  
223 to target expression of hM4Di-mCherry to VIP and SST interneurons (Taniguchi et al.,  
224 2011). In both lines, POm neurons were transfected using AAV-ChR2-YFP viral vectors.  
225 Cortical injections of the conditional hM4Di-mCherry vector resulted in robust and

226 widespread expression (**Figure 3A,E, Supplementary Figure 3**). To determine  
227 efficiency and specificity of labeling we performed immunohistochemistry using anti-SST  
228 and anti-VIP antibodies. 100% of the hM4Di-mCherry-positive cells were positive for their  
229 respective markers (**Supplementary Figure 3**). Labeled cells were found in all layers, in  
230 accordance with described expression patterns (Taniguchi et al., 2011; Pfeffer et al., 2013;  
231 Prönneke et al., 2015). Recordings were made from mCherry-expressing cells (without  
232 DREADD activation; **Figure 3A,B**) in L2/3. The smaller membrane capacitance ( $C_m$ )  
233 compared to L2/3 pyramidal neurons further supported that we had targeted interneurons  
234 (**Supplementary Figure 3**) (Gertler et al., 2008).

235

236 POM and L4-stimulation evoked depolarizing PSPs in both interneuron types (**Figure**  
237 **3C,D,G,H**). The evoked POM/L4 PSP ratios were larger for VIP interneurons, but not for  
238 SST interneurons, as compared to L2/3 pyramidal neurons (**Supplementary Figure 3**).  
239 This demonstrates that stimulation of both pathways generates synaptic responses in VIP  
240 and SST interneurons, and that POM afferents provide a relatively strong input to VIP  
241 interneurons. This result is congruent with the previously observed robust POM-to-VIP  
242 monosynaptic responses and weak POM-to-SST polysynaptic responses (Audette et al.,  
243 2017).

244

245 For VIP interneurons a single paired stimulation (PS, POM-OS and L4-ES) evoked  
246 significantly larger mean PSP amplitudes than POM-OS alone and was similar to what  
247 would be predicted (predicted PS) based on linear summation of average L4-ES and POM-  
248 OS responses alone (**Figure 3C,D**).

249

250 In contrast, for SST interneurons PS-evoked depolarizing PSP amplitudes were significantly  
251 smaller than the L4-ES and predicted PS amplitudes (**Figure 3G,H**). Mean PS PSP  
252 amplitudes were not significantly different from POM-OS. In fact, the response frequently  
253 turned into a hyperpolarizing PSP (**Figure 3G,H**). Indeed, the PS/L4-ES EPSP ratios were  
254 much smaller in SST interneurons as compared to L2/3 pyramidal neurons and VIP  
255 interneurons (**Supplementary Figure 3**). These results suggest that PS inhibits SST  
256 interneurons. The diminished depolarization could be due to VIP interneuron-mediated  
257 inhibition of SST interneurons, which would translate into diminished SST spiking. This in  
258 turn would disinhibit L2/3 pyramidal neurons. Indeed, we found that SST and VIP  
259 interneurons intermittently spiked at rest. VIP interneurons tended to increasingly spike



260 upon PS, whereas SST interneurons tended to decrease their spiking activity  
261 (**Supplementary Figure 3**).

262

263 Altogether, these data show that PS of L4 and POM inputs increases VIP and reduces SST  
264 interneuron activity, which is a typical attribute of the VIP-SST-L2/3 disinhibitory microcircuit  
265 (Pfeffer et al., 2013; Lee et al., 2013).

266

267 **Reduced VIP interneuron activity lowers L2/3 pyramidal neuron PSPs and**  
268 **increases inhibitory conductance**

269 To test whether reduced SST interneurons activity disinhibits L2/3 pyramidal neurons, and  
270 whether reduced VIP interneurons activity prevents disinhibition, we recorded from L2/3  
271 pyramidal neurons while reducing the activity of these hM4Di-expressing interneurons with  
272 bath applied CNO (**Figure 4A,E**). We assumed that reducing their activity potentially had  
273 widespread effects on barrel column circuits based on the finding that hM4Di-expressing  
274 interneurons were found in areas (~750  $\mu\text{m}$ ) exceeding the size of barrel-related columns,  
275 and because the far majority of each interneuron population was expressing the transgene  
276 within the transfected areas (**Supplementary Figure 3**).

277

278 Firstly, we confirmed that CNO reduced the activity of hM4Di-expressing cells by  
279 performing targeted recordings of mCherry-positive neurons. The CNO caused a significant  
280 decrease in the resting potential and reduced the ability to induce APs for the same  
281 absolute amount of injected current (**Supplementary Figure 4**).

282

283 Reduced SST interneuron activity significantly increased L4 and POM-evoked PSP  
284 amplitudes in L2/3 pyramidal neurons (**Figure 4B-D**). Conversely, reduced VIP  
285 interneuron activity significantly decreased POM-evoked PSP amplitudes (**Figure 4F-H**).  
286 This corroborates our hypothesis that the pairing of L4 and POM inputs leads to a  
287 disinhibition of L2/3 pyramidal neurons through a POM-to-VIP-to-SST-to-L2/3 microcircuit.

288

289 To further confirm that VIP interneurons can disinhibit L2/3 pyramidal neurons upon PS, we  
290 performed voltage-clamp recordings in L2/3 pyramidal neurons while silencing VIP  
291 interneurons using hM4Di (**Figure 4E**). PS-evoked postsynaptic currents were recorded at  
292 various holding potentials (-70mV, -50mV, -30mV, and 0mV) before and after addition of  
293 CNO to generate synaptic current-voltage (I-V) curves (**Figure 4I**). Under both conditions

294 we found a linear relationship between the integrated currents and the holding potentials.  
295 Reduced VIP interneuron activity significantly increased the slope of the I-V curve (**Figure**  
296 **4I**). Based on the I-V regression slopes and the synaptic reversal potentials we calculated  
297 the inhibitory conductance ( $G_i$ ) over time (**Figure 4J,K**) (Gambino and Holtmaat, 2012;  
298 House et al., 2011; Monier et al., 2008).

299  
300 The  $G_i$  in L2/3 pyramidal neurons significantly increased upon addition of CNO (**Figure**  
301 **4J,K**). This demonstrates that reduced VIP interneuron activity increases inhibition though  
302 other inhibitory interneuron subtypes, most likely though SST interneurons as shown here  
303 (Pfeffer et al., 2013), but possibly also though Parvalbumin-expressing (PV) interneurons  
304 (Pi et al., 2013). Together these data indicate that increased activity of VIP interneurons as  
305 elicited by paired intra-cortical and thalamic POM inputs promotes disinhibition of L2/3  
306 pyramidal neurons. This may gate LTP.

307

#### 308 **Reduced VIP interneuron activity prevents RPS-evoked LTP in L2/3** 309 **pyramidal neurons**

310 To test whether disinhibition gates RPS-driven LTP we first measured the effects of RPS on  
311 L2/3 pyramidal neurons while reducing the activity of hM4Di-expressing SST interneurons  
312 with CNO (**Figure 5A**). Under these conditions RPS evoked significantly larger cumulative  
313 PSP amplitudes during rhythmic stimulation as compared to normal RPS (**Supplementary**  
314 **Figure 5**).

315

316 RPS readily drove LTP under reduced SST interneuron activity (**Figure 5A-C**). Omitting  
317 RPS while reducing SST interneuron activity did not increase PSP amplitudes over time,  
318 indicating that LTP was not due to a ramping up of responses upon prolonged inactivity  
319 (**Figure 5D**). This data is consistent with the idea that disinhibition is a permissive factor  
320 for the induction of LTP. This prompts the question as to whether disinhibition alone would  
321 be sufficient to drive LTP of rhythmically stimulated intracortical synapses, or whether direct  
322 glutamatergic POM input to L2/3 pyramidal neurons is an additional requirement. To test  
323 this we expressed hM4Di in SST interneurons as well as in the POM, and reduced both of  
324 their activity with CNO while rhythmically stimulating L4 (RES, 8Hz for 1min; **Figure 5E**).  
325 RES did not evoke LTP under these conditions. This shows that direct inputs from the POM  
326 to L2/3 pyramidal neurons as well as the disinhibition are required to drive LTP (**Figure**  
327 **5F-G**).

328

329 If VIP interneurons are driving this disinhibition, and their activation is unequivocally  
330 required to facilitate LTP, then reduced VIP interneuron activity should also inhibit the LTP.  
331 To test this we measured the effects of RPS on L2/3 pyramidal neurons while reducing the  
332 activity of hM4Di-expressing VIP neurons with CNO (**Figure 5I**). Under these conditions  
333 RPS resulted in significantly smaller cumulative and mean PSP amplitudes throughout the  
334 pairing (**Supplementary Figure 5**), and it did not drive LTP (**Figure 5J-K**). RPS could,  
335 however, induce LTP when CNO was not present (**Figure 5L**), and omitting RPS did not  
336 increase PSP amplitudes, indicating respectively, that the lack of LTP was not due to the  
337 expression of hM4Di per se and not caused by a ramping down of PSP amplitudes with  
338 prolonged VIP interneuron inactivation (**Figure 5L**).

339

340 Altogether, these data show that the repeated coincident activation of intracortical synaptic  
341 circuitry together with higher-order thalamic input gates plasticity of intracortical synapses  
342 in S1 via disinhibition.

343

#### 344 **DISCUSSION**

345 We showed that the rhythmic co-activation (RPS, 8Hz) of L4-ascending (lemniscal) and  
346 POm-feedback (paralemiscal) projections to S1 induces LTP of synapses on L2/3  
347 pyramidal neurons. LTP expression was NMDAR-dependent and not caused by plasticity of  
348 inhibitory synapses. It was occluded when, immediately prior to brain slicing, whiskers were  
349 stimulated (10min at 8Hz). The latter has been shown previously to induce an LTP of  
350 whisker-evoked PSPs (Mégevand et al., 2009; Gambino et al., 2014). This suggests that  
351 both LTP paradigms share expression mechanisms and most likely recruit the same  
352 synaptic circuits. Thus, the *ex vivo* paradigm that we developed here represents a suitable  
353 model for dissecting microcircuits that underlie plasticity of cortical pyramidal neurons *in*  
354 *vivo*.

355

356 The LTP was observed at synapses that were recruited by electrical stimulation of L4, but  
357 was also critically dependent upon POm activity. L4-RES could drive LTP, but this was less  
358 reliable than RPS. Moreover, decreasing POm activity during L4-RES and RPS prevented  
359 LTP. This is congruent with findings *in vivo*, where a block of POm activity during RWS  
360 prevented LTP expression. Thus, collective recruitment or stimulation of intra-cortical, and  
361 long-range axons that ascend through L4, including those originating from the POm,

362 underlies the L4-RES that successfully elicited LTP. These findings imply that this type of  
363 plasticity is caused by cooperative synapses, similar to what has been observed in other  
364 preparations (Golding et al., 2002; Sjöström and Häusser, 2006; Dudman et al., 2007;  
365 Brandalise and Gerber, 2014; Basu et al., 2016).

366

367 While the activity of POrn projections was required for the increase in L4-evoked PSP  
368 amplitudes, their own synapses were not themselves potentiated. This suggests that the  
369 strength of POrn synapses is saturated or that they lack the molecular mechanisms to  
370 express LTP upon this type of paired stimulation (Kotaleski and Blackwell, 2010).  
371 Alternatively, the differential effects on POrn and L4 inputs may be related to the location of  
372 their synapses. The electrical stimulus may recruit various ascending projections traversing  
373 through L4, including those originating from L4 and L5 neurons (Feldmeyer, 2012;  
374 Petreanu et al., 2009; Lefort et al., 2009). Therefore, the potentiated synapses that are  
375 recruited by L4 stimulation may be located, not only on basal dendrites but at various  
376 locations along the dendritic tree, including apical dendrites. They may be positioned and  
377 perhaps clustered around locations susceptible to compartmentalized calcium events  
378 (Kleindienst et al., 2011; Takahashi et al., 2012) whereas POrn inputs may not. In addition,  
379 local depolarization at these clusters could be amplified by the disinhibitory gate that we  
380 have illustrated (Gentet et al., 2012; Pfeffer et al., 2013; Lee et al., 2013; Pi et al., 2013).

381

382 The LTP occurred in the absence of somatic spikes since we did not observe any during  
383 RPS. Thus, the LTP was dependent upon subthreshold depolarization rather than bAPs,  
384 similar to RWS-evoked LTP (Gambino et al., 2014) and hippocampal LTP in slices  
385 (Golding et al., 2002; Dudman et al., 2007; Brandalise and Gerber, 2014). Indeed, when we  
386 examined the first responses upon RPS we noticed that PSP amplitudes were significantly  
387 higher as compared to those evoked by L4 stimulation alone. The size of LTP expression  
388 was correlated with the amplitude of these initial RPS-evoked PSPs, but not correlated with  
389 the size of baseline PSP amplitudes under various experimental conditions. In addition, an  
390 NMDAR block diminished the temporal summation of RPS-evoked dendritic depolarization.  
391 Thus, similar to RWS-driven LTP *in vivo*, the potentiation of synapses by RPS was  
392 dependent on an NMDAR-dependent sustained increase in postsynaptic depolarization.

393

394 In addition to excitatory synaptic inputs to pyramidal neurons, both POrn and L4 stimulation  
395 evoked PSPs in VIP and SST interneurons, in agreement with recent studies (Wall et al.,

396 2016; Audette et al., 2017). Our experiments did not necessarily distinguish between  
397 monosynaptic or polysynaptic inputs. Notably, the direct input of POM axons to SST  
398 neurons might be very weak (Wall et al., 2016; Audette et al., 2017). Nonetheless, in our  
399 experiments, the activation of both pathways caused spikes in both interneurons, and when  
400 the two stimuli were combined, the VIP neurons increased their activity. Interestingly, the  
401 SST interneurons experienced a decrease in evoked PSP amplitudes; their spiking rate did  
402 not increase and even tended to be lower as compared to L4 stimulation alone. Thus,  
403 pairing of the two pathways preferentially activates a cortical circuit that increases VIP and  
404 suppresses SST interneuron activity, conceptually similar to responses mediated by  
405 whisking in S1 (Lee et al., 2013; Gentet et al., 2012) ; by reinforcement signals in auditory  
406 cortex (Pi et al., 2013); and by locomotion in visual cortex (Fu et al., 2014).

407

408 L2/3 pyramidal neuron apical dendrites are strongly inhibited by SST interneurons (Wang  
409 et al., 2004; Kapfer et al., 2007), which are in turn inhibited, by VIP interneurons (Pfeffer et  
410 al., 2013; Lee et al., 2013). Thus, POM and L4 pairing could reduce the inhibition of L2/3  
411 apical dendrites through the suppression of SST interneuron activity, mediated by  
412 increased VIP interneuron activity. Various types of long-range and local inputs have been  
413 shown to recruit a similar disinhibitory circuit (Lee et al., 2013; Pi et al., 2013; Fu et al.,  
414 2014). In our experiments, the synaptic silencing of SST interneurons increased both POM  
415 and L4-evoked PSP amplitudes, and synaptic silencing of VIP interneurons suppressed  
416 POM-evoked PSPs. Furthermore, reduced VIP interneuron activity increased inhibitory  
417 conductances on L2/3 pyramidal neurons when POM and L4 pathways were paired.  
418 Therefore, POM activity not only evokes excitatory responses in L2/3 pyramidal neuron  
419 dendrites, but also causes a disinhibition when paired with L4 stimulation.

420

421 Our results demonstrate that the recruitment of a VIP interneuron-associated disinhibitory  
422 motif is essential for eliciting synaptic plasticity, and strongly suggest that excitatory POM  
423 projections provide the necessary input to activate it. The effect of these excitatory long-  
424 range projections on plasticity, via their activation of disinhibitory VIP interneurons, bears  
425 similarities to the effect of the long-range inhibitory projections from the entorhinal cortex  
426 that directly inhibit hippocampal CCK interneurons to enhance plasticity (Basu et al.,  
427 2016). This is also similar to disinhibition-mediated plasticity that is caused by increased  
428 long-range, cholinergic inputs to the auditory cortex (Letzkus et al., 2011); and the  
429 plasticity in the visual cortex caused by running (Fu et al., 2015).

430

431 The gating of cortical plasticity by the POm could be widespread. The axonal projections of  
432 a single POm neuron to S1 spans large cortical areas (Lu and Lin, 1993; Ohno et al.,  
433 2012). Therefore, their activation could unlock a large cortical region for plasticity, thereby  
434 allowing receptive field changes beyond a single cortical (barrel) column that are dependent  
435 on postsynaptic and NMDA-driven mechanisms (Diamond et al., 1994; Gambino and  
436 Holtmaat, 2012).

437

438 Higher-order thalamic nuclei such as the POm are thought to provide feedback and  
439 contextual information to the primary sensory cortex (Larkum, 2013; Sherman, 2016; Roth  
440 et al., 2016). Our data suggest that these feedback signals could gate plasticity in  
441 pyramidal neurons and reinforce the synapses of the first-order pathways that convey the  
442 principal sensory information. This could be a mechanism for the tuning of cortical synaptic  
443 circuits during sensory learning. Interestingly, VIP interneurons in S1 are also activated by  
444 projections from the vibrissal primary motor cortex (vM1), which highlights another, now  
445 motor related, mechanism for disinhibiting L2/3 pyramidal neurons (Lee et al., 2013). Thus,  
446 whisking and contextual sensory feedback could cooperate to powerfully gate synaptic  
447 plasticity of L2/3 pyramidal neurons in S1.

448

#### 449 **ACKNOWLEDGMENTS**

450 This project was supported by the Swiss National Science Foundation (grant  
451 #31003A\_153228, #CRSII3\_154453), and the International Foundation for Research in  
452 Paraplegia. We thank Meaghan Creed, Ronan Chéreau, Stéphane Pages, and Foivos  
453 Markopoulos for their technical expertise, and comments on the manuscript and  
454 experimental design.

455

#### 456 **AUTHOR CONTRIBUTIONS**

457 L.E.W designed and performed the experiments, analyzed the data, and wrote the  
458 manuscript. A.H. designed the experiments and wrote the manuscript.

459

#### 460 **DECLARATION OF INTERESTS**

461 The authors declare no competing interests.

462

463

464 **REFERENCES**

- 465 Agmon, A., and Connors, B.W. (1991). Thalamocortical responses of mouse  
466 somatosensory (barrel) cortex in vitro. *Neuroscience* *41*, 365-379.
- 467 Armbruster, B.N., Li, X., Pausch, M.H., Herlitze, S., and Roth, B.L. (2007). Evolving the lock  
468 to fit the key to create a family of G protein-coupled receptors potently activated by an  
469 inert ligand. *Proc Natl Acad Sci U S A* *104*, 5163-5168.
- 470 Audette, N.J., Urban-Ciecko, J., Matsushita, M., and Barth, A.L. (2017). POM  
471 Thalamocortical Input Drives Layer-Specific Microcircuits in Somatosensory Cortex. *Cereb*  
472 *Cortex* , 1-17.
- 473 Avermann, M., Tomm, C., Mateo, C., Gerstner, W., and Petersen, C.C. (2012).  
474 Microcircuits of excitatory and inhibitory neurons in layer 2/3 of mouse barrel cortex. *J*  
475 *Neurophysiol* *107*, 3116-3134.
- 476 Basu, J., Zaremba, J.D., Cheung, S.K., Hitti, F.L., Zemelman, B.V., Losonczy, A., and  
477 Siegelbaum, S.A. (2016). Gating of hippocampal activity, plasticity, and memory by  
478 entorhinal cortex long-range inhibition. *Science* *351*, aaa5694.
- 479 Bliss, T.V., and Collingridge, G.L. (1993). A synaptic model of memory: long-term  
480 potentiation in the hippocampus. *Nature* *361*, 31-39.
- 481 Brandalise, F., and Gerber, U. (2014). Mossy fiber-evoked subthreshold responses induce  
482 timing-dependent plasticity at hippocampal CA3 recurrent synapses. *Proc Natl Acad Sci U*  
483 *S A* *111*, 4303-4308.
- 484 Bureau, I., von Saint Paul, F., and Svoboda, K. (2006). Interdigitated paralemniscal and  
485 lemniscal pathways in the mouse barrel cortex. *PLoS Biol* *4*, e382.
- 486 Diamond, M.E., Huang, W., and Ebner, F.F. (1994). Laminar comparison of somatosensory  
487 cortical plasticity. *Science* *265*, 1885-1888.
- 488 Dudman, J.T., Tsay, D., and Siegelbaum, S.A. (2007). A role for synaptic inputs at distal  
489 dendrites: instructive signals for hippocampal long-term plasticity. *Neuron* *56*, 866-879.
- 490 Feldman, D.E. (2009). Synaptic mechanisms for plasticity in neocortex. *Annu Rev Neurosci*  
491 *32*, 33-55.
- 492 Feldmeyer, D. (2012). Excitatory neuronal connectivity in the barrel cortex. *Front Neuroanat*  
493 *6*, 24.
- 494 Froemke, R.C. (2015). Plasticity of Cortical Excitatory-Inhibitory Balance. *Annu Rev*  
495 *Neurosci*
- 496 Fu, Y., Kaneko, M., Tang, Y., Alvarez-Buylla, A., and Stryker, M.P. (2015). A cortical  
497 disinhibitory circuit for enhancing adult plasticity. *Elife* *4*, e05558.

- 498 Fu, Y., Tucciarone, J.M., Espinosa, J.S., Sheng, N., Darcy, D.P., Nicoll, R.A., Huang, Z.J.,  
499 and Stryker, M.P. (2014). A cortical circuit for gain control by behavioral state. *Cell* *156*,  
500 1139-1152.
- 501 Gambino, F., and Holtmaat, A. (2012). Spike-timing-dependent potentiation of sensory  
502 surround in the somatosensory cortex is facilitated by deprivation-mediated disinhibition.  
503 *Neuron* *75*, 490-502.
- 504 Gambino, F., Pagès, S., Kehayas, V., Baptista, D., Tatti, R., Carleton, A., and Holtmaat, A.  
505 (2014). Sensory-evoked LTP driven by dendritic plateau potentials in vivo. *Nature* *515*,  
506 116-119.
- 507 Gentet, L.J., Kremer, Y., Taniguchi, H., Huang, Z.J., Staiger, J.F., and Petersen, C.C.  
508 (2012). Unique functional properties of somatostatin-expressing GABAergic neurons in  
509 mouse barrel cortex. *Nat Neurosci* *15*, 607-612.
- 510 Gertler, T.S., Chan, C.S., and Surmeier, D.J. (2008). Dichotomous anatomical properties of  
511 adult striatal medium spiny neurons. *J Neurosci* *28*, 10814-10824.
- 512 Golding, N.L., Staff, N.P., and Spruston, N. (2002). Dendritic spikes as a mechanism for  
513 cooperative long-term potentiation. *Nature* *418*, 326-331.
- 514 House, D.R., Elstrott, J., Koh, E., Chung, J., and Feldman, D.E. (2011). Parallel regulation  
515 of feedforward inhibition and excitation during whisker map plasticity. *Neuron* *72*, 819-831.
- 516 Jouhanneau, J.S., Ferrarese, L., Estebanez, L., Audette, N.J., Brecht, M., Barth, A.L., and  
517 Poulet, J.F. (2014). Cortical fosGFP expression reveals broad receptive field excitatory  
518 neurons targeted by POM. *Neuron* *84*, 1065-1078.
- 519 Kapfer, C., Glickfeld, L.L., Atallah, B.V., and Scanziani, M. (2007). Supralinear increase of  
520 recurrent inhibition during sparse activity in the somatosensory cortex. *Nat Neurosci* *10*,  
521 743-753.
- 522 Kleindienst, T., Winnubst, J., Roth-Alpermann, C., Bonhoeffer, T., and Lohmann, C. (2011).  
523 Activity-dependent clustering of functional synaptic inputs on developing hippocampal  
524 dendrites. *Neuron* *72*, 1012-1024.
- 525 Kotaleski, J.H., and Blackwell, K.T. (2010). Modelling the molecular mechanisms of  
526 synaptic plasticity using systems biology approaches. *Nat Rev Neurosci* *11*, 239-251.
- 527 Larkum, M. (2013). A cellular mechanism for cortical associations: an organizing principle  
528 for the cerebral cortex. *Trends Neurosci* *36*, 141-151.
- 529 Lee, S., Kruglikov, I., Huang, Z.J., Fishell, G., and Rudy, B. (2013). A disinhibitory circuit  
530 mediates motor integration in the somatosensory cortex. *Nat Neurosci* *16*, 1662-1670.



- 531 Lefort, S., Tomm, C., Floyd Sarria, J.C., and Petersen, C.C. (2009). The excitatory neuronal  
532 network of the C2 barrel column in mouse primary somatosensory cortex. *Neuron* *61*,  
533 301-316.
- 534 Letzkus, J.J., Wolff, S.B., Meyer, E.M., Tovote, P., Courtin, J., Herry, C., and Lüthi, A.  
535 (2011). A disinhibitory microcircuit for associative fear learning in the auditory cortex.  
536 *Nature* *480*, 331-335.
- 537 Lu, S.M., and Lin, R.C. (1993). Thalamic afferents of the rat barrel cortex: a light- and  
538 electron-microscopic study using Phaseolus vulgaris leucoagglutinin as an anterograde  
539 tracer. *Somatosens Mot Res* *10*, 1-16.
- 540 Mégevand, P., Troncoso, E., Quairiaux, C., Muller, D., Michel, C.M., and Kiss, J.Z. (2009).  
541 Long-term plasticity in mouse sensorimotor circuits after rhythmic whisker stimulation. *J*  
542 *Neurosci* *29*, 5326-5335.
- 543 Monier, C., Fournier, J., and Frégnac, Y. (2008). In vitro and in vivo measures of evoked  
544 excitatory and inhibitory conductance dynamics in sensory cortices. *J Neurosci Methods*  
545 *169*, 323-365.
- 546 Ohno, S., Kuramoto, E., Furuta, T., Hioki, H., Tanaka, Y.R., Fujiyama, F., Sonomura, T.,  
547 Uemura, M., Sugiyama, K., and Kaneko, T. (2012). A morphological analysis of  
548 thalamocortical axon fibers of rat posterior thalamic nuclei: a single neuron tracing study  
549 with viral vectors. *Cereb Cortex* *22*, 2840-2857.
- 550 Petreanu, L., Mao, T., Sternson, S.M., and Svoboda, K. (2009). The subcellular  
551 organization of neocortical excitatory connections. *Nature* *457*, 1142-1145.
- 552 Pfeffer, C.K., Xue, M., He, M., Huang, Z.J., and Scanziani, M. (2013). Inhibition of inhibition  
553 in visual cortex: the logic of connections between molecularly distinct interneurons. *Nat*  
554 *Neurosci* *16*, 1068-1076.
- 555 Pi, H.J., Hangya, B., Kvitsiani, D., Sanders, J.I., Huang, Z.J., and Kepecs, A. (2013).  
556 Cortical interneurons that specialize in disinhibitory control. *Nature* *503*, 521-524.
- 557 Prönneke, A., Scheuer, B., Wagener, R.J., Möck, M., Witte, M., and Staiger, J.F. (2015).  
558 Characterizing VIP Neurons in the Barrel Cortex of VIPcre/tdTomato Mice Reveals Layer-  
559 Specific Differences. *Cereb Cortex*
- 560 Roth, M.M., Dahmen, J.C., Muir, D.R., Imhof, F., Martini, F.J., and Hofer, S.B. (2016).  
561 Thalamic nuclei convey diverse contextual information to layer 1 of visual cortex. *Nat*  
562 *Neurosci* *19*, 299-307.
- 563 Sherman, S.M. (2016). Thalamus plays a central role in ongoing cortical functioning. *Nat*  
564 *Neurosci* *19*, 533-541.

- 565 Sjöström, P.J., and Häusser, M. (2006). A cooperative switch determines the sign of  
566 synaptic plasticity in distal dendrites of neocortical pyramidal neurons. *Neuron* *51*, 227-  
567 238.
- 568 Sjöström, P.J., Rancz, E.A., Roth, A., and Häusser, M. (2008). Dendritic excitability and  
569 synaptic plasticity. *Physiol Rev* *88*, 769-840.
- 570 Stachniak, T.J., Ghosh, A., and Sternson, S.M. (2014). Chemogenetic synaptic silencing of  
571 neural circuits localizes a hypothalamus→midbrain pathway for feeding behavior. *Neuron*  
572 *82*, 797-808.
- 573 Takahashi, N., Kitamura, K., Matsuo, N., Mayford, M., Kano, M., Matsuki, N., and Ikegaya,  
574 Y. (2012). Locally synchronized synaptic inputs. *Science* *335*, 353-356.
- 575 Taniguchi, H., He, M., Wu, P., Kim, S., Paik, R., Sugino, K., Kvitsiani, D., Kvitsani, D., Fu,  
576 Y., Lu, J., Lin, Y., Miyoshi, G., Shima, Y., Fishell, G., Nelson, S.B., and Huang, Z.J.  
577 (2011). A resource of Cre driver lines for genetic targeting of GABAergic neurons in  
578 cerebral cortex. *Neuron* *71*, 995-1013.
- 579 Ting, J.T., Daigle, T.L., Chen, Q., and Feng, G. (2014). Acute brain slice methods for adult  
580 and aging animals: application of targeted patch clamp analysis and optogenetics.  
581 *Methods Mol Biol* *1183*, 221-242.
- 582 Wall, N.R., De La Parra, M., Sorokin, J.M., Taniguchi, H., Huang, Z.J., and Callaway, E.M.  
583 (2016). Brain-Wide Maps of Synaptic Input to Cortical Interneurons. *J Neurosci* *36*, 4000-  
584 4009.
- 585 Wang, Y., Toledo-Rodriguez, M., Gupta, A., Wu, C., Silberberg, G., Luo, J., and Markram,  
586 H. (2004). Anatomical, physiological and molecular properties of Martinotti cells in the  
587 somatosensory cortex of the juvenile rat. *J Physiol* *561*, 65-90.
- 588 Wimmer, V.C., Bruno, R.M., de Kock, C.P., Kuner, T., and Sakmann, B. (2010).  
589 Dimensions of a projection column and architecture of VPM and POM axons in rat  
590 vibrissal cortex. *Cereb Cortex* *20*, 2265-2276.
- 591 Zhang, F., Wang, L.P., Boyden, E.S., and Deisseroth, K. (2006). Channelrhodopsin-2 and  
592 optical control of excitable cells. *Nat Methods* *3*, 785-792.

593

## 594 **FIGURE LEGENDS**

### 595 **Figure 1. POM inputs facilitate LTP of L2/3 pyramidal neuron synapses.**

596 (A) Schematic and bright field image of the POM and VPM and their projections to the  
597 barrel cortex (BC) in thalamocortical slices. AAV-mediated expression of ChR2-Tdtomato is  
598 directed to the POM. (B) Schematic of the somatosensory thalamocortical (POM and VPM)

599 projections and their relation to intracortical circuits in the BC. Recordings are made in L2/3  
600 pyramidal neurons, while electrically stimulating L4 (L4-ES) and/or optically stimulating the  
601 ChR2-expressing POM projections (POM-OS). (C) *Top*, bright field image of the BC.  
602 *Middle top*, fluorescent image of L1 and L5 ChR2-tdTomato expressing POM projections.  
603 *Middle bottom*, example of experimental configuration; a bipolar stimulating electrode (SE)  
604 in L4 and a recording electrode (RE) on a L2/3 pyramidal neuron. *Bottom*, confocal image  
605 of ChR2-tdTomato-expressing (ChR2) POM projections in L1 and L2/3, and a L2/3  
606 pyramidal neuron (Pyr) filled with biocytin-streptavidin after patching. (D) *Top*, typical L2/3  
607 pyramidal neuron firing pattern upon current injection steps (40pA). *Below*, Representative  
608 traces of L4-ES PSP with/without bath application of Ptx (100 $\mu$ M) and NBQX (10 $\mu$ M).  
609 *Bottom*, representative trace of POM-OS PSP with/without Ptx (100 $\mu$ M) and NBQX (10 $\mu$ M).  
610 (E) Experimental protocol: alternating L4-ES and POM-OS at 0.1Hz (pre RPS; 5min),  
611 followed by rhythmic pairing of L4-ES and POM-OS at 8Hz (RPS; 1min), followed by  
612 alternating L4-ES and POM-OS at 0.1Hz (post RPS; 24 min). (F) *Left*, L4-ES PSP  
613 amplitudes in an example cell. *Right*, representative L4-ES PSPs pre vs. post RPS. Grey  
614 lines represent individual traces, and black lines their average (G) The population (bars)  
615 and cell (lines) mean L4-ES PSP amplitudes pre vs. post RPS; n=8 cells;  $P=0.04$ ; paired  
616 Student's t-test. Yellow line, representative cell in (F). (H) *Left*, POM-OS PSP amplitudes in  
617 an example cell. *Right*, representative POM-OS PSP pre vs. post RPS. (I) Mean POM-OS  
618 PSP amplitudes pre vs. post RPS; n=8 cells;  $P=0.57$ ; paired Student's t-test. (J) *Bottom*,  
619 Confocal image of POM expression of hM4Di-mCitrine (green), ChR2-tdTomato (red). *Top*,  
620 magnified confocal image of POM cells expressing both hM4Di-mCitrine and ChR2-  
621 tdTomato. (K) POM-OS PSP failure rate (%) pre CNO vs. post CNO; n=13;  $P=0.016$ ; paired  
622 Student's t-test. (L) *Left*, L4-ES PSP amplitudes in example cells for RPS<sub>POM-hM4Di</sub> and RPS,  
623 both with CNO. *Right*, representative L4-ES PSP, pre and post RPS<sub>POM-hM4Di</sub>+CNO. (M)  
624 Mean L4-ES PSP amplitudes pre vs. post RPS<sub>POM-hM4Di</sub>+CNO; n=6;  $P=0.07$ ; paired  
625 Student's t-test. (N) Normalized L4-ES PSP amplitudes after RPS under various conditions.  
626 RPS+CNO drives LTP, whereas RPS<sub>POM-hM4Di</sub>+CNO fails to elicit LTP;  $P=0.01$ . The addition  
627 of CNO does not alter the ability of RPS to drive LTP;  $P=0.76$ ; two-way repeated measures  
628 ANOVA.

629

630 **Figure 2. RPS-evoked LTP is NMDA-dependent and shares expression**  
631 **mechanisms with whisker stimulation-evoked LTP *in vivo*.**

632 (A) *Left*, L4-ES PSP<sub>Pyr</sub> amplitudes in an example cell in Ptx (100 $\mu$ M). *Right*, representative  
633 L4-ES PSP pre vs. post RPS +Ptx. (B) Mean L4-ES PSP amplitudes pre vs. post RPS +Ptx,  
634 n=10 cells,  $P=0.009$ ; paired Student's t-test. (C) *Left*, L4-ES PSP amplitudes in an example  
635 cell +Ptx, APV (50 $\mu$ M). *Right*, Representative L4-ES PSPs pre vs. post RPS +Ptx, APV. (D)  
636 Mean L4-ES PSP<sub>Pyr</sub> amplitudes pre vs. post RPS +Ptx, APV, n=6 cells,  $P=0.11$ ; paired  
637 Student's t-test. (E) Normalized L4-ES PSP amplitudes, comparing RPS +Ptx vs. +Ptx,  
638 APV, and No RPS +Ptx (n=5),  $P=0.035$ ; Two-way repeated measures ANOVA. Post-hoc,  
639 Bonferroni's multiple comparisons test, from 22 min: +Ptx vs. +Ptx, APV,  $P<0.02$ ; +Ptx vs.  
640 No RPS +Ptx,  $P<0.02$ ; R+Ptx, APV vs. No RPS +Ptx,  $P>0.99$ . (F) *Top*, Experimental  
641 schematic: RWS (all whiskers, 8Hz, 10min) followed by slicing, and RPS (8Hz, 1min).  
642 *Below*, L4-ES PSP amplitudes in an example cell for RPS<sub>RWS</sub>. *Right*, representative L4-ES  
643 PSP pre and post RPS<sub>RWS</sub>. (G) Mean L4-ES PSP amplitudes pre vs. post RPS<sub>RWS</sub>, n=6  
644 cells,  $P=0.75$ ; paired Student's t-test. (H) Normalized L4-ES PSP<sub>Pyr</sub> amplitudes for RPS<sub>RWS</sub>.  
645

646 **Figure 3. Pairing of L4-ES and POM-OS increases VIP and reduces SST**  
647 **interneuron activity.**

648 (A,E) Experimental design and schematic of AAV directed hM4Di-mCherry expression in  
649 the BC in a VIP-Cre and SST-Cre driver lines, and ChR2-YFP expression in the POM.  
650 *Below*, fluorescence image of hM4Di-mCherry expression and ChR2-YFP-positive POM  
651 projections in BC. (B,F) Schematic of the circuit, with a targeted patch recording of a  
652 hM4Di-mCherry-positive VIP or SST interneuron to measure possible inputs (dotted arrows)  
653 from POM and/or L4. (C,G) Representative traces of L4-ES, POM-OS, and PS in VIP (C) or  
654 SST (G) interneurons (without CNO). (D) Mean L4-ES PSP amplitudes in VIP interneurons,  
655 n=7 (L4 vs. POM,  $P=0.04$ ; POM vs. PS,  $P=0.04$ ; PS vs. L4,  $P=0.06$ ; PS vs. Predicted PS,  
656  $P=0.17$ ); paired Student's t-test. (H) Mean L4-ES PSP amplitudes in SST interneurons, n=5  
657 (L4 vs. POM,  $P=0.13$ ; POM vs. PS,  $P=0.37$ ; PS vs. L4,  $P=0.02$ ; PS vs. Predicted PS,  
658  $P=0.01$ ); paired Student's t-test.

659

660 **Figure 4. Reduced VIP interneuron activity decreases L2/3 pyramidal neuron**  
661 **PSP amplitudes and increases inhibitory conductances.**

662 (A,E) Schematic of the circuit, with a patch recording of L2/3 pyramidal neurons to measure  
663 the effects of hM4Di-mediated reduction in SST and VIP interneuron activity. (B,F)*Top*,  
664 representative L4-ES PSP pre and post CNO (500nM) in SST-hM4Di (B) and VIP-hM4Di  
665 slices (F). *Bottom*, representative POM-OS PSP pre and post CNO in SST-hM4Di (B) and

666 VIP-hM4Di slices (F). (C) Mean L4-ES PSP amplitudes pre vs. post CNO in SST-hM4Di  
667 slices, n=9 cells,  $P=0.01$ ; paired Student's t-test. (D) Mean POM-OS PSP amplitudes pre  
668 vs. post CNO in SST-hM4Di slices, n=9 cells;  $P=0.02$ ; paired Student's t-test. (G) Mean L4-  
669 ES PSP amplitudes pre vs. post CNO in VIP-hM4Di slices, n=12 cells,  $P=0.06$ ; paired  
670 Student's t-test. (H) Mean POM-OS PSP amplitudes pre vs. post CNO in VIP-hM4Di slices,  
671 n=12 cells;  $P=0.04$ ; paired Student's t-test. (I) *Left*, examples of PS evoked currents in L2/3  
672 pyramidal neurons pre (blue) and post (red) CNO (500nM) in VIP-hM4Di slices at four  
673 different holding potentials (-70mV, -50mV, -30mV, and 0mV). *Right*, Synaptic V-I curves  
674 (mean $\pm$ sd). Linearity is assessed by linear regression, slopes pre vs. post CNO, n=7,  
675  $P=0.0365$ , analysis of covariance (ANCOVA). (J) Averaged PS evoked synaptic inhibitory  
676 conductances over time pre vs. post CNO. Shaded areas indicate SEM. (K) mean  
677 integrated inhibitory conductance ( $G_i$ ) in L2/3 pyramidal neurons pre vs. post CNO in VIP-  
678 hM4Di slices, n=7 cells,  $P=0.006$ ; paired Student's t-test.

679

680

681 **Figure 5. Reduced VIP interneuron activity prevents RPS-evoked LTP in L2/3**  
682 **pyramidal neurons.**

683 (A,E,I) *Top*, schematic of the circuit, with a patch recording of a L2/3 pyramidal neuron to  
684 measure the effects of hM4Di-mediated reduction in SST, SST & POM, and VIP activity on  
685 RPS or RES-induced plasticity. (B,F,J) *Right*, L4-ES PSP amplitudes in an example cell  
686 upon RPS<sub>SST-hM4Di</sub> (B), RES<sub>SST&POM-hM4Di</sub> (F), and RPS<sub>VIP-hM4Di</sub> (J) in CNO. *Left*, representative  
687 L4-ES PSPs pre vs. post CNO in RPS<sub>SST-hM4Di</sub> (B), RES<sub>SST&POM-hM4Di</sub> (F) and RPS<sub>VIP-hM4Di</sub> (J)  
688 in CNO. (C) Mean L4-ES PSP amplitudes pre vs. post RPS<sub>SST-hM4Di</sub>, n=6 cells,  $P=0.048$ ;  
689 paired Student's t-test. (D) Normalized L4-ES PSP amplitudes, comparing RPS<sub>SST-hM4Di</sub> to  
690 No RPS<sub>SST-hM4Di</sub> (n=4),  $P=0.049$ ; Two-way repeated measures ANOVA. (G) Mean L4-ES  
691 PSP amplitudes pre vs. post RES<sub>SST&POM-hM4Di</sub>, n=7 cells,  $P=0.85$ ; paired Student's t-test. (H)  
692 Normalized L4-ES PSP amplitudes for RES<sub>SST&POM-hM4Di</sub>. (K) Mean L4-ES PSP amplitudes  
693 pre vs. post RPS<sub>VIP-hM4Di</sub>, n=7 cells,  $P=0.08$ ; paired Student's t-test. (L) Normalized L4-ES  
694 PSP amplitudes, comparing RPS<sub>VIP-hM4Di</sub>+CNO, No RPS<sub>VIP-hM4Di</sub> (n=5 cells), and RPS<sub>VIP-hM4Di</sub>  
695 (n=3 cells),  $P<0.0001$  (Post-hoc Bonferroni's multiple comparisons test, from 12 min:  
696 RPS<sub>VIP-hM4Di</sub> vs. No RPS<sub>VIP-hM4Di</sub>+CNO,  $P>0.99$ ; RPS<sub>VIP-hM4Di</sub>+ CNO vs. RPS<sub>VIP-hM4Di</sub>,  $P<0.03$ ;  
697 No RPS<sub>VIP-hM4Di</sub>+CNO vs. RPS<sub>VIP-hM4Di</sub>,  $P<0.007$ ; two-way repeated measures ANOVA).  
698

699 **Supplementary Figure 1. Analysis of AAV-directed expression of ChR2 and**  
700 **inhibition of the POM prevents RPS induced LTP.**

701 (A) Images of thalamocortical slices containing only ChR2-tdTomato-positive POM  
702 projections (left) or containing ChR2-tdTomato-positive POM and VPM projections (right) in  
703 the BC. (B) Intensity profile (a.u.) of ChR2-tdTomato expression from the pia to L5,  
704 comparing POM only, POM + VPM, and No ChR2 expression. (C) Mean L4 (400-600  $\mu$ M  
705 from pia edge) ChR2-tdTomato fluorescence intensity in POM only (P; n=15,  $1.5\pm 0.1$ a.u.),  
706 POM + VPM (P+V; n=5,  $3.9\pm 0.8$ a.u.) and No ChR2 (No; n=6,  $1.6\pm 0.4$ a.u.). Stats: P vs. P+V,  
707  $P=0.0005$  ( $\beta=0.99$ ), No vs. P,  $P=0.47$ . No vs. P+V,  $P=0.018$  ( $\beta=0.10$ ), Student's t-tests. (D)  
708 *Left*, L4-RES experimental protocol. (E) *Left*, mean L4-ES PSP amplitudes pre  
709 ( $1.27\pm 0.23$ mV) vs. post ( $2.23\pm 0.55$ mV) L4-RES. Stats: n=7,  $P=0.12$  ( $\beta=0.32$ ), paired  
710 Student's t-test. *Right*, mean L4-ES PSP amplitudes pre ( $2.36\pm 0.56$ mV) vs. post  
711 ( $2.02\pm 1.17$ mV) L4-RES<sub>POM-hM4Di</sub> + CNO (500nM), n=6,  $P=0.72$ ; paired Student's t-test  
712 ( $\beta=0.06$ ). (F) Normalized L4-ES PSP amplitudes, 2 min bins, comparing L4-RES, n=7, vs.  
713 L4-RES<sub>POM-hM4Di</sub>, n=6;  $P=0.028$ ; Two-way repeated measures ANOVA. (G) *Left*, mean L4-  
714 ES PSP amplitude before rhythmic stimulation (pre RS) vs. LTP size (post RS). Stats:  
715 Pearson's  $r=-0.31$ ,  $r^2=0.096$ ,  $P=0.12$ . *Right*, mean POM-OS PSP amplitude before RS vs.  
716 LTP size. Stats: Pearson's  $r=-0.36$ ,  $r^2=0.13$ ,  $P=0.20$ . (H) Rs (*left*),  $\Delta$ Rs (*middle*), and  
717 maximum current injection (*right*) vs. LTP size. Stats: respectively, Pearson's  $r=0.25$ ,  
718  $r^2=0.6$ ,  $P=0.21$ ;  $r=0.20$ ,  $r^2=0.04$ ,  $P=0.33$ ;  $r=-0.01$ ,  $r^2<0.01$ ,  $P=0.99$ ). (I) Representative traces  
719 for the initial portion of the rhythmic (8Hz) stimulation, comparing RPS to L4-RES<sub>POM-hM4Di</sub>.  
720 (J) Cumulative PSP amplitudes during rhythmic stimulation. Stats: n=14,  $P<0.0001$ , two-  
721 way repeated measures ANOVA. (K) PSP amplitudes across time points during rhythmic  
722 stimulation, comparing RPS to L4-RES<sub>POM-hM4Di</sub>. Stats: n=14,  $P=0.036$ ; two-way repeated  
723 measures ANOVA. (L) *Top*, mean L4-ES PSP amplitude at baseline, comparing RPS  
724 ( $1.35\pm 0.36$ mV, n=8) to L4-RES<sub>POM-hM4Di</sub> ( $2.17\pm 0.54$ mV, n=6). Stats:  $P=0.22$  ( $\beta=0.97$ ),  
725 Student's t-test. *Bottom*, amplitude of the 1<sup>st</sup> PSP during the rhythmic stimulation (RS),  
726 comparing RPS ( $2.41\pm 0.42$ mV, n=8) to L4-RES<sub>POM-hM4Di</sub> ( $1.17\pm 0.25$ mV, n=6). Stats:  
727  $P=0.037$  ( $\beta=0.99$ ), Student's t-test. (M) 1<sup>st</sup> PSP amplitude of RS, normalized to the mean  
728 baseline L4-ES PSP amplitude vs. LTP size (%). Stats: Pearson's  $r=0.56$ ,  $r^2=0.31$ ,  
729  $P=0.003$ .

730

731 **Supplementary Figure 2. RPS-induced cumulative PSP amplitudes under**  
732 **various conditions.**

733 (A) Representative traces for the initial portion of rhythmic (8Hz) stimulation, comparing  
734 recordings under Ptx, Ptx+APV, RWS, and a 2<sup>nd</sup> RPS. (B) Cumulative PSP amplitudes  
735 during RPS, comparing Ptx, Ptx+APV, RWS, and a 2<sup>nd</sup> RPS. Stats:  $P < 0.0001$ , Two-way  
736 ANOVA. Post-hoc Bonferroni's multiple comparisons: Ptx vs. Ptx+APV,  $P < 0.0001$ ; Ptx vs.  
737 RWS,  $P = 0.04$ ; Ptx vs. 2<sup>nd</sup> RPS,  $P < 0.0001$ ; Ptx+APV vs. RWS,  $P < 0.0001$ ; RWS vs. 2<sup>nd</sup> RPS,  
738  $P < 0.0001$ . (C) Mean PSP amplitude across time points during RPS, comparing Ptx,  
739 Ptx+APV, RWS, and 2<sup>nd</sup> RPS. Stats:  $P = 0.49$ ; repeated measures Two-way ANOVA. (D)  
740 *Left*, Mean L4-ES PSP amplitude at baseline, comparing Ptx ( $n = 10$ ,  $1.25 \pm 0.27$ mV),  
741 Ptx+APV ( $n = 6$ ,  $1.05 \pm 0.38$ mV), RWS ( $n = 7$ ,  $1.18 \pm 0.26$ mV), and 2<sup>nd</sup> RPS ( $n = 3$ ,  
742  $4.02 \pm 1.39$ mV). Stats: Ptx vs. Ptx+APV,  $P = 0.67$  ( $\beta = 0.23$ ); Ptx vs. RWS,  $P = 0.87$  ( $\beta = 0.25$ );  
743 Ptx+APV vs. RWS,  $P = 0.77$  ( $\beta = 0.25$ ); 2<sup>nd</sup> RPS vs. Ptx,  $P = 0.008$  ( $\beta = 0.99$ ); 2<sup>nd</sup> RPS vs. Ptx,  
744  $P = 0.03$  ( $\beta = 0.98$ ); 2<sup>nd</sup> RPS vs. RWS,  $P = 0.02$ ; Student's t-tests. *Right*, 1<sup>st</sup> PSP amplitudes  
745 during RPS, comparing Ptx ( $n = 10$ ,  $1.89 \pm 0.47$ mV), Ptx+APV ( $n = 6$ ,  $1.04 \pm 0.33$ mV), RWS  
746 ( $n = 7$ ,  $1.31 \pm 0.27$ mV), and 2<sup>nd</sup> RPS ( $n = 3$ ,  $2.69 \pm 0.77$ mV). Stats: Ptx vs. Ptx+APV,  $P = 0.23$   
747 ( $\beta = 0.98$ ); Ptx vs. RWS,  $P = 0.36$  ( $\beta = 0.90$ ); Ptx+APV vs. RWS,  $P = 0.55$  ( $\beta = 0.45$ ); 2<sup>nd</sup>RPS vs.  
748 Ptx,  $P = 0.43$  ( $\beta = 0.45$ ); 2<sup>nd</sup> RPS vs. Ptx+APV,  $P = 0.05$ ; 2<sup>nd</sup> RPS vs. RWS,  $P = 0.06$  ( $\beta = 0.45$ );  
749 Student's t-tests. (E) Normalized L4-ES PSP amplitudes across RPS followed by a  
750 2<sup>nd</sup>RPS. (G) LTP ratio (pre/post) comparing the 1<sup>st</sup> RPS ( $n = 3$ ,  $2.21 \pm 0.31$ ) to the 2<sup>nd</sup>RPS  
751 ( $0.80 \pm 0.17$ ). Stats:  $P = 0.02$  ( $\beta = 0.99$ ); Student's t-test.

752

753 **Supplementary Figure 3. Analysis of hM4Di-mCherry expression and spiking**  
754 **in SST and VIP-Cre driver lines.**

755 (A,D) Image of SST-hM4Di (A) and VIP-hM4Di (D) expression in L1-L6 of the BC. Dotted  
756 lines indicate the dimensions over which the area of expression was measured. (B) Width  
757 measurement of expression across layers in the SST-Cre driver line. Stats: L1 ( $n = 13$ ,  
758  $859 \pm 462$  $\mu$ m) vs. L4 ( $436 \pm 191$  $\mu$ m),  $P = 0.04$  ( $\beta = 1.00$ ); L2/3 ( $824 \pm 331$  $\mu$ m) vs. L4,  
759  $P = 0.001$  ( $\beta = 0.19$ ); L4 vs. L5 ( $809 \pm 440$  $\mu$ m),  $P = 0.01$  ( $\beta = 1.0$ ); and L2/3 vs. L5,  $P = 0.94$ ;  
760 Student's t-tests. (C) Number of cells per layer expressing hM4Di-mCherry in the SST-Cre  
761 driver line vs. distance from the pia (100 $\mu$ m binning). (E) Width measurement of expression  
762 across layers in the VIP-Cre driver line. Stats: L1 ( $n = 17$ ,  $792 \pm 180$  $\mu$ m) vs. L4 ( $364 \pm 152$  $\mu$ m),  
763  $P < 0.0001$ ; L2/3 ( $697 \pm 178$  $\mu$ m) vs. L4,  $P < 0.0001$  ( $\beta = 1.0$ ); L4 vs. L5 ( $536 \pm 355$  $\mu$ m),  $P = 0.20$   
764 ( $\beta = 1.0$ ); L1 vs. L5,  $P = 0.015$  ( $\beta = 1.0$ ); and L2/3 vs. L5,  $P = 0.06$  ( $\beta = 0.99$ ); and L1 vs. L2/3,  
765  $P = 0.13$  ( $\beta = 0.99$ ); Student's t-tests. (F) Number of cells per layer expressing hM4Di-  
766 mCherry in the VIP-Cre driver line vs. distance from the pia (100 $\mu$ m binning). (G) hM4Di  
767 expression area in SST-Cre mice ( $n = 14$ ,  $0.90 \pm 0.10$ mm<sup>2</sup> $\times 10^3$ ) compared to VIP-Cre mice

768 (n=15,  $0.72 \pm 0.08 \text{mm}^2 \times 10^3$ ). Stats:  $P=0.17$  ( $\beta=1.0$ ); Student's t-test. (J) Membrane  
769 capacitance ( $C_m$ ), comparing Pyr (n=15,  $99 \pm 8 \text{pF}$ ), SST (n=5,  $52 \pm 13 \text{pF}$ ) and VIP (n=7,  
770  $49 \pm 4 \text{pF}$ ) cells. Stats: Pyr vs. SST,  $P=0.008$  ( $\beta=1.0$ ); Pyr vs. VIP,  $P=0.001$  ( $\beta=1.0$ ); VIP vs.  
771 SST,  $P=0.79$  ( $\beta=0.13$ ); Student's t-tests. (I) *Left*, confocal images of anti-SST and SST-  
772 hM4Di-mCherry overlap in the injection area (SST-hM4Di+ & anti-SST+), outside of the  
773 injection area (SST-hM4Di- & anti-SST+), and in control sections with secondary antibody  
774 only (SST-hM4Di+ & anti-SST-). *Right*, fluorescence intensity in the injection areas (yellow  
775 dots) SST-hMD4i Fluo. Intensity ( $3.7 \pm 0.1 \text{a.u.}$ ) vs. anti-SST Fluo. Intensity ( $6.4 \pm 0.1 \text{a.u.}$ ),  
776 outside the injection area (green) SST-hMD4i ( $1.6 \pm 0.3 \text{a.u.}$ ) vs. anti-SST ( $6.9 \pm 0.1 \text{a.u.}$ ), and in  
777 control slices with secondary antibody only (red) SST-hMD4i ( $2.9 \pm 0.2 \text{a.u.}$ ) vs. anti-SST  
778 ( $0.2 \pm 0.01 \text{a.u.}$ ). In the SST-line (n=7), 77% of the anti-SST-positive cells co-expressed  
779 hM4Di-mCherry (i.e. efficiency), the other 33% were anti-SST positive cells but not  
780 transfected. 100% of the hM4Di-mCherry-positive cells were labeled with anti-SST (i.e.  
781 specificity). (J) *Left*, confocal images of anti-VIP and VIP-hM4Di-mCherry overlap in the  
782 injection areas (VIP-hM4Di+ & anti-VIP+), outside of the injection area (VIP-hM4Di- & anti-  
783 VIP+), and in control sections with secondary antibody only (VIP-hM4Di+ & anti-VIP-).  
784 *Right*, Fluorescence intensity in the injection area (yellow) VIP-hMD4i Fluo. Intensity  
785 ( $5.9 \pm 0.2 \text{a.u.}$ ) vs. anti-VIP Fluo. Intensity ( $12.6 \pm 0.2 \text{a.u.}$ ), outside of the injection area (green)  
786 VIP-hMD4i ( $0.9 \pm 0.01 \text{a.u.}$ ) vs. anti-VIP ( $12.7 \pm 0.5 \text{a.u.}$ ), and in control sections with  
787 secondary antibody only (red) VIP-hMD4i ( $9.5 \pm 0.2 \text{a.u.}$ ) vs. anti-VIP ( $0.2 \pm 0.04 \text{a.u.}$ ). In the  
788 VIP-line (n=8), 86% of the anti-VIP-positive were found to co-express hM4Di-mCherry, and  
789 100% of the hM4Di-mCherry-positive cells were labeled with anti-VIP. (K) *Left*, P<sub>Om</sub>-OS  
790 over L4-ES PSP amplitude ratios, comparing Pyr (n=8,  $0.35 \pm 0.04$ ), VIP (n=7,  $0.66 \pm 0.1$ ),  
791 and SST (n=5,  $0.62 \pm 0.2$ ). Stats: Pyr vs. VIP  $P=0.001$  ( $\beta=1.0$ ); Pyr vs. SST,  $P=0.4$  ( $\beta=0.99$ );  
792 VIP vs. SST,  $P=0.83$  ( $\beta=0.99$ ) paired Student's t-tests. *Right*, PS over L4-ES PSP  
793 amplitude ratios, comparing Pyr (n=8,  $2.35 \pm 0.7$ ), VIP (n=7,  $1.23 \pm 0.08$ ), and SST (n=5,  
794  $0.43 \pm 0.4$ ). Stats: Pyr vs. VIP  $P=0.40$  ( $\beta=1.0$ ); Pyr vs. SST,  $P=0.01$  ( $\beta=1.0$ ); VIP vs. SST,  
795  $P=0.0003$  ( $\beta=0.99$ ); paired Student's t-tests. (L,M) *Left*, typical spiking pattern of a SST (L)  
796 and VIP (M) interneurons after a depolarizing current step. *Middle*, representative trace of a  
797 spike upon PS. *Right*, Fraction of stimuli (%) that induced spikes in SST (L) and VIP (M)  
798 interneurons. Stats: comparing spikes in SST cells: P<sub>Om</sub> (n=5,  $3.1 \pm 2.8\%$ ) vs PS  
799 ( $6.6 \pm 2.4\%$ ),  $P=0.5$  ( $\beta=0.78$ ); P<sub>Om</sub> vs. L4 ( $20.13 \pm 6.76$ ),  $P=0.1$  ( $\beta=0.99$ ); PS vs. L4,  $P=0.07$   
800 ( $\beta=0.99$ ); comparing spikes in VIP cells, P<sub>Om</sub> (n=7,  $7.1 \pm 11.8\%$ ) vs. PS ( $34.2 \pm 13.4\%$ ),



801  $P=0.07$  ( $\beta=0.99$ ); POm vs. L4 ( $17.77\pm 10.16\%$ ),  $P=0.35$  ( $\beta=0.72$ ); PS vs. L4,  $P=0.038$   
802 ( $\beta=0.93$ ); paired Student's t-tests.

803

804 **Supplementary Figure 4. Validation of hM4Di DREADDs in VIP interneurons.**

805 (A) Resting membrane potential of VIP interneurons. Stats: pre CNO ( $n=7$ ,  $-77.6\pm 2.12\text{mV}$ )  
806 vs. post CNO ( $84.56\pm 3.70\text{mV}$ ),  $P=0.01$  ( $\beta=0.99$ ), paired Student's t-test. (B) Representative  
807 traces of hyperpolarizing and depolarizing current steps ( $40\text{pA}$ ) pre and post CNO in VIP  
808 interneurons. (C) AP frequency (Hz) as a function of current input ( $\text{pA}$ ). Stats:  $n=7$ ,  
809  $P<0.0001$ , two-way ANOVA.

810

811 **Supplementary Figure 5. SST and VIP interneurons bi-directionally modulate**  
812 **RPS-induced cumulative PSP amplitudes in L2/3 pyramidal neurons.**

813 (A) Representative traces for the initial portion of RPS while reducing SST ( $\text{RPS}_{\text{SST-hM4Di}}$ ) or  
814 VIP ( $\text{RPS}_{\text{VIP-hM4Di}}$ ) interneuron activity. (B) Cumulative PSP amplitudes in L2/3 pyramidal  
815 neurons during RPS, comparing RPS,  $\text{RPS}_{\text{SST-hM4Di}}$  and  $\text{RPS}_{\text{VIP-hM4Di}}$ . Stats:  $n=21$ ,  $P<0.0001$ ;  
816 two-way ANOVA. Post-hoc Bonferroni's multiple comparisons: RPS vs.  $\text{RPS}_{\text{VIP-hM4Di}}$ ,  
817  $P<0.0001$ ; RPS vs.  $\text{RPS}_{\text{SST-hM4Di}}$ ,  $P<0.0001$ ;  $\text{RPS}_{\text{VIP-hM4Di}}$  vs.  $\text{RPS}_{\text{SST-hM4Di}}$ ,  $P<0.0001$ . (C)  
818 Mean PSP amplitude across time points during RPS, comparing RPS,  $\text{RPS}_{\text{VIP-hM4Di}}$ , and  
819  $\text{RPS}_{\text{SST-hM4Di}}$ . Stats:  $P=0.01$ , two-way repeated measures ANOVA. Post-hoc Bonferroni's  
820 multiple comparisons: 1sec, RPS vs.  $\text{RPS}_{\text{VIP-hM4Di}}$ ,  $P=0.12$ ; RPS vs.  $\text{RPS}_{\text{SST-hM4Di}}$ ,  $P=0.003$ ;  
821  $\text{RPS}_{\text{VIP-hM4Di}}$  vs.  $\text{RPS}_{\text{SST-hM4Di}}$ ,  $P<0.0001$ . 5sec, RPS vs.  $\text{RPS}_{\text{VIP-hM4Di}}$ ,  $P=0.12$ ; RPS vs.  
822  $\text{RPS}_{\text{SST-hM4Di}}$ ,  $P=0.65$ ;  $\text{RPS}_{\text{VIP-hM4Di}}$  vs.  $\text{RPS}_{\text{SST-hM4Di}}$ ,  $P>0.99$ . 60sec, RPS vs.  $\text{RPS}_{\text{VIP-hM4Di}}$ ,  
823  $P>0.99$ ; RPS vs.  $\text{RPS}_{\text{SST-hM4Di}}$ ,  $P=0.65$ ;  $\text{RPS}_{\text{VIP-hM4Di}}$  vs.  $\text{RPS}_{\text{SST-hM4Di}}$ ,  $P>0.99$ . (D) Mean L4-  
824 ES PSP amplitudes at baseline, comparing RPS ( $n=8$ ,  $1.41\pm 0.24\text{mV}$ ),  $\text{RPS}_{\text{VIP-hM4Di}}$  ( $n=7$ ,  
825  $1.13\pm 0.23\text{mV}$ ), and  $\text{RPS}_{\text{SST-hM4Di}}$  ( $n=6$ ,  $2.51\pm 0.48\text{mV}$ ). Stats:  $\text{RPS}_{\text{VIP-hM4Di}}$  vs.  $\text{RPS}_{\text{SST-hM4Di}}$ ,  
826  $P=0.02$  ( $\beta=0.99$ );  $\text{RPS}_{\text{VIP-hM4Di}}$  vs. RPS,  $P=0.42$  ( $\beta=0.99$ );  $\text{RPS}_{\text{SST-hM4Di}}$  vs. RPS,  $P=0.045$ ;  
827 Student's t-tests. (E) 1<sup>st</sup> RPS PSP amplitude, comparing RPS ( $2.41\pm 0.42\text{mV}$ ),  $\text{RPS}_{\text{VIP-hM4Di}}$   
828 ( $1.02\pm 0.21\text{mV}$ ), and  $\text{RPS}_{\text{SST-hM4Di}}$  ( $3.89\pm 0.79\text{mV}$ ). Stats: RPS vs.  $\text{RPS}_{\text{VIP-hM4Di}}$   $P=0.01$   
829 ( $\beta=1.00$ ); RPS vs.  $\text{RPS}_{\text{SST-hM4Di}}$ ,  $P=0.12$  ( $\beta=0.99$ );  $\text{RPS}_{\text{VIP-hM4Di}}$  vs.  $\text{RPS}_{\text{SST-hM4Di}}$ ,  $P=0.02$ ;  
830 Student's t-tests. (F) 1<sup>st</sup> RPS PSP amplitude, normalized to mean baseline L4-ES PSPs,  
831 comparing RPS ( $2.41\pm 0.42\text{mV}$ ),  $\text{RPS}_{\text{VIP-hM4Di}}$  ( $1.02\pm 0.21\text{mV}$ ), and  $\text{RPS}_{\text{SST-hM4Di}}$   
832 ( $3.89\pm 0.79\text{mV}$ ). Stats: RPS vs.  $\text{RPS}_{\text{VIP-hM4Di}}$   $P=0.004$  ( $\beta=1.00$ ); RPS vs.  $\text{RPS}_{\text{SST-hM4Di}}$ ,  
833  $P=0.12$  ( $\beta=0.99$ );  $\text{RPS}_{\text{VIP-hM4Di}}$  vs.  $\text{RPS}_{\text{SST-hM4Di}}$ ,  $P=0.02$  ( $\beta=1.00$ ); Student's t-tests.

834

835 **STAR METHODS**

836 **KEY RESOURCES TABLE**

| REAGENT or RESOURCE                                                         | SOURCE                            | IDENTIFIER                                                                                                                                                                                                                                                            |
|-----------------------------------------------------------------------------|-----------------------------------|-----------------------------------------------------------------------------------------------------------------------------------------------------------------------------------------------------------------------------------------------------------------------|
| <b>Antibodies</b>                                                           |                                   |                                                                                                                                                                                                                                                                       |
| VIP, rabbit polyclonal IgG                                                  | Immunostar                        | #20077, RRID: AB_572270                                                                                                                                                                                                                                               |
| SST, rat IgG2b, YC7 clone                                                   | Merck <a href="#">Millipore</a> . | #MAB354, RRID:AB_2255365                                                                                                                                                                                                                                              |
| Goat anti-Rat IgG (H+L) Cross-Adsorbed Secondary Antibody, Alexa Fluor 647  | Thermo Fisher Scientific          | Cat #:A-21247;; RRID AB_141778.                                                                                                                                                                                                                                       |
| Goat anti-Rabbit IgG (H+L) Superclonal™ Secondary Antibody, Alexa Fluor 647 | Thermo Fisher Scientific          | Cat # A32733, RRID AB_2633282                                                                                                                                                                                                                                         |
| <b>Bacterial and Virus Strains</b>                                          |                                   |                                                                                                                                                                                                                                                                       |
| AAV1.CAGGS.Flex.ChR2-tdTomato.WPRE.SV40                                     | U Penn Vector Core, Pennsylvania  | <a href="https://www.med.upenn.edu/gtp/vectorcore/">https://www.med.upenn.edu/gtp/vectorcore/</a>                                                                                                                                                                     |
| AAV5.EF1a.DIO.hChR2(H134R)-eYFP.WPRE.hGH                                    | Addgene                           | Addgene20298P                                                                                                                                                                                                                                                         |
| AAV9.CMV.PI.Cre.rBG                                                         | U Penn Vector Core, Pennsylvania  | <a href="https://www.med.upenn.edu/gtp/vectorcore/">https://www.med.upenn.edu/gtp/vectorcore/</a>                                                                                                                                                                     |
| AAV2.hSyn.HA-hM4D(Gi).IRES.mCitrine                                         | UNC vector core                   | <a href="https://www.med.unc.edu/genetherapy/vectorcore">https://www.med.unc.edu/genetherapy/vectorcore</a>                                                                                                                                                           |
| rAAV8.hSyn.DIO.hm4D(Gi).mCherry                                             | Addgene                           | #44362-AAV2                                                                                                                                                                                                                                                           |
| <b>Chemicals, Peptides, and Recombinant Proteins</b>                        |                                   |                                                                                                                                                                                                                                                                       |
| Clozapine <i>N</i> -oxide                                                   | Tocris                            | Cat. No. 4936                                                                                                                                                                                                                                                         |
| Picrotoxin                                                                  | Tocris                            | Cat. No. 1128                                                                                                                                                                                                                                                         |
| CNQX                                                                        | Tocris                            | Cat. No. 1045                                                                                                                                                                                                                                                         |
| DAP5                                                                        | Tocris                            | Cat. No. 0106/1                                                                                                                                                                                                                                                       |
| Biocytin                                                                    | Tocris                            | Cat. No. 3349                                                                                                                                                                                                                                                         |
| QX-314Cl                                                                    | Tocris                            | Cat. No. 2313                                                                                                                                                                                                                                                         |
| <b>Experimental Models: Organisms/Strains</b>                               |                                   |                                                                                                                                                                                                                                                                       |
| Mouse/C57BL/6JRj                                                            | Janvier Labs                      | <a href="https://www.janvier-labs.com/rodent-research-models-services/research-models/per-species/inbred-mice/product/c57bl6jrj.html">https://www.janvier-labs.com/rodent-research-models-services/research-models/per-species/inbred-mice/product/c57bl6jrj.html</a> |
| Mouse/SST-IRES-Cre                                                          | Jackson Labs                      | #013044<br>RRID:MGI:4838419                                                                                                                                                                                                                                           |
| Mouse/VIP-IRES-Cre                                                          | Jackson Labs                      | #010908,<br>RRID:MGI:3054170                                                                                                                                                                                                                                          |
| <b>Software and Algorithms</b>                                              |                                   |                                                                                                                                                                                                                                                                       |
| Ephus software                                                              | the Janelia Farm Research Center  | <a href="http://research.janelia.org/labs/display/ephus">http://research.janelia.org/labs/display/ephus</a> : the Janelia Farm Research Center                                                                                                                        |

|                      |                                              |                                                                                     |
|----------------------|----------------------------------------------|-------------------------------------------------------------------------------------|
| Prism 7 for Mac OS X | GraphPad Software, Inc, La Jolla California, | Version 7.0a, April 2, 2016, <a href="http://www.graphpad.com">www.graphpad.com</a> |
| Clampfit 10          | Molecular Devices, LLC                       | Version 10.8.01<br><a href="http://mdc.custhelp.com">http://mdc.custhelp.com</a>    |
| Image J              | The NIH                                      | <a href="https://imagej.nih.gov/ij/">https://imagej.nih.gov/ij/</a>                 |
| MATLAB               | MathWorks                                    | <a href="https://www.mathworks.com/">https://www.mathworks.com/</a>                 |

837

### 838 **Contact for Reagent and Resource Sharing**

839 Further information and requests for resources and reagents should be directed to and will  
840 be fulfilled by the Lead Contact, Anthony Holtmaat ([Anthony.Holtmaat@unige.ch](mailto:Anthony.Holtmaat@unige.ch))

841

### 842 **Experimental Model and Subject Details**

#### 843 *Animals*

844 All procedures were carried out in accordance with protocols approved by the ethics  
845 committee of the University of Geneva and the authorities of the Canton of Geneva. All  
846 animals were housed at the University of Geneva's Animal Care facility under normal  
847 light/dark cycles. We used male, C57BL/6J mice and two transgenic Cre-recombinase  
848 driver lines, one expressing Cre in SST (*SST-ires-Cre*) interneurons and the other in VIP  
849 (*VIP-ires-Cre*) interneurons (Taniguchi et al., 2011). AAV-directed injections were  
850 performed at 4 weeks of age and after 2-3 weeks of infection (2.5-3 months of age) mice  
851 were euthanized and slice electrophysiology was performed. All transgenes were used as  
852 homozygotes.

853

### 854 **Method Details**

#### 855 *Virus Injection*

856 Mice, aged postnatal days 28-35, were anesthetized using isoflurane (4% with 0.5 lmin<sup>-1</sup>  
857 O<sub>2</sub>). Body temperature was maintained at 37°C by a feedback controlled heating pad  
858 (FHC). Eye ointment was applied to prevent dehydration and mice were put in a stereotaxic  
859 frame. The skin was disinfected with betadine. A burr hole was made in the skull with a  
860 pneumatic drill above the region of interest. Injections were targeted to the caudal part of  
861 the POm (coordinates from bregma: RC, -2.20mm; ML, -1.20mm; DV, -3.00) and/or the BC  
862 (coordinates from bregma: RC, -1.5mm; ML, -3.5; Z, -0.4) (Gambino et al., 2014).  
863 Expression of ChR2-TdTomato or ChR2-YFP expression was targeted to POm neurons  
864 using FLEx AAV vectors (AAV1.CAGGS.Flex.ChR2-tdTomato.WPRE.SV40;  
865 AAV5.EF1a.DIO.hChR2(H134R)-eYFP.WPRE.hGH), combined with AAV Cre vectors  
866 (AAV9.CMV.PI.Cre.rBG). hM4Di DREADD (Armbruster et al., 2007) was expressed in the  
867 POm using non-flex AAVs (AAV2.hSyn.HA-hM4D(Gi).IRES.mCitrine). hM4Di-mCherry was

868 expressed in the VIP-Cre and SST-Cre driver lines using a FLEX AAV vector  
869 (rAAV8.hSyn.DIO.hm4D(Gi).mCherry).

870

871 The virus was injected (~200nl in the POm and ~100nl in the BC) using a glass pipette  
872 attached to a hydraulic manipulator (MMO-220A, Narishigi) at a maximum rate of 100nl  
873 min<sup>-1</sup>. The solution was allowed to diffuse for at least 10min before the pipette was  
874 withdrawn. Once injections were completed the craniotomy was filled with Kwik-Cast (WPI)  
875 and the skin re-attached with stainless steel staples (Precise DS15, 3M). In accordance  
876 with Swiss Federal laws, analgesia as provided by local lidocaine (1%) application. A  
877 subcutaneous injection of buprenorphine (Temgesic, 0.05mg kg<sup>-1</sup>) was given to reduce  
878 postoperative pain.

879

#### 880 *Thalamocortical slice preparation*

881 2-4 weeks post-viral injections, mice were anesthetized with isoflurane and decapitated. A  
882 vibrating microtome was used to prepare 350- $\mu$ m-thick thalamocortical slices according an  
883 acute brain slice method for adult and aging animals (Agmon and Connors, 1991; Ting et  
884 al., 2014). Slicing was performed in cold NMDG artificial cerebrospinal fluid solution (aCSF,  
885 300-305 mOsm, pH 7.3), containing the following (in mM): 92 NMDG, 2.5 KCl, 1.25  
886 NaH<sub>2</sub>PO<sub>4</sub>\*H<sub>2</sub>O, 30 NaHCO<sub>3</sub>, 20 HEPES, 25 glucose, 2 thiourea, 5 Na-ascorbate, 3 Na-  
887 pyruvate, 0.5 CaCl<sub>2</sub>\*2H<sub>2</sub>O, 10 MgSO<sub>4</sub>\*7H<sub>2</sub>O (Agmon and Connors, 1991; Ting et al., 2014).  
888 Slices were then transferred to NMDG aCSF solution at 35°C for 20min, after which slices  
889 were immersed in a HEPES aCSF solution (300-305mOsm, pH 7.3), at room temperature,  
890 (in mM): 92 NaCl, 2.5 KCl, 1.25 NaH<sub>2</sub>PO<sub>4</sub>\*H<sub>2</sub>O, 30 NaHCO<sub>3</sub>, 20 HEPES, 25 glucose, 2  
891 thiourea, 5 Na-ascorbate, 3 Na-pyruvate, 2 CaCl<sub>2</sub>\*2H<sub>2</sub>O, and MgSO<sub>4</sub>\*7H<sub>2</sub>O. 95% O<sub>2</sub> + 5%  
892 CO<sub>2</sub> was bubbled through all solutions.

893

#### 894 *Electrophysiology*

895 Whole-cell current-clamp recordings were obtained from patched L2/3 pyramidal neurons  
896 or fluorescence-guided targeted patched VIP or SST interneurons. Recordings were  
897 performed in freshly prepared aCSF, bubbled with 95% O<sub>2</sub> + 5% CO<sub>2</sub>, at an osmolarity of  
898 300-305mOsm, containing (in mM): 119 NaCl, 24 NaHCO<sub>3</sub>, 2.5 KCl, 1.25 NaH<sub>2</sub>PO<sub>4</sub>\*H<sub>2</sub>O, 2  
899 MgSO<sub>4</sub>\*7H<sub>2</sub>O, 2 CaCl<sub>2</sub>\*2H<sub>2</sub>O, and 12.5 Glucose. Patch pipettes (5-8 m $\Omega$ ) were filled with  
900 290-295 mOsm internal solution containing (in mM): 135 K-gluconate, 5 KCl, 10  
901 Phosphocreatine, 4 Mg ATP, 0.3 NaGTP, 2.68 (0.1%) Biocytin, and 10mM HEPES. After

902 break-in the cell was allowed to equilibrate for 5 minutes. Membrane capacitance ( $C_m$ ) and  
903 series resistance ( $R_s$ ) was documented. A series of hyperpolarizing and depolarizing step  
904 currents (40pA increments) of 500ms duration were applied to measure intrinsic properties  
905 and spike patterns of each neuron.

906

907 Postsynaptic potentials (PSPs) were evoked by electrical stimulation (0.2 ms) with a bipolar  
908 stimulating electrode (matrix tungsten electrode, FHC) placed in L4, and by optical  
909 stimulation of ChR2-expressing P<sub>Om</sub> fibers. For optical stimulation, a 5 ms light emitting  
910 diode (LED) pulse (excitation  $\lambda$ 470nm, Thorlabs, Germany) was applied through the  
911 objective above L1. Electrical stimuli were tuned to yield a  $\sim$ 1mV PSP baseline response.  
912 The power of the optical stimuli after the objective was kept at  $\sim$ 0.9mW x mm<sup>2</sup>.

913

914 In whole-cell current-clamp, the experimental LTP protocol consisted of a 5-min baseline  
915 period in which electrical stimuli (L4-ES; 0.1Hz) were alternated with optical stimuli (P<sub>Om</sub>-  
916 OS; 0.1Hz) every 1 min, followed by a 1-min period of rhythmic paired stimulation (RPS;  
917 8Hz), and a 30-min plasticity readout period with the same stimuli as during baseline.  
918 During RPS L4-ES and P<sub>Om</sub>-OS were applied at the exact same time. We then compared  
919 the average amplitude of the PSPs over the baseline (pre RPS, 0-5min; 30 stimulations)  
920 with those over the final 5 min of the recordings (pre RPS, 25-30min; 30 stimulations). The  
921 level of LTP was calculated per cell, as well as an average over cells. Synaptic responses  
922 were monitored before, during, and after the RPS.

923

924 Voltage-clamp recordings were made using a cesium-based internal solution: (in mM) 135  
925 cesium methylsulfonate, 4 QX-314Cl, 10 HEPES, 10 Phosphocreatine, 4 Mg-ATP, 0.3 Na-  
926 GTP, 3 biocytin, 0.1 spermine, 7.25 pH adjusted with CsOH, 290-295 mOsm).

927

928 For chemogenetic silencing experiments, CNO (500 nM) was bath applied 5 min prior to the  
929 recordings. CNO remained present during the recordings. CNQX (10 $\mu$ M, Tocris), Ptx (100  
930  $\mu$ M, Tocris) and/or DAP5 (50 $\mu$ M, Tocris) were applied in a similar way and remained  
931 present throughout the recordings.

932

### 933 *Whisker stimulation*

934 For occlusion experiments, 2-4 weeks post-AAV injection, anesthesia was induced using  
935 isoflurane and maintained by IP injection of Medetomidine (Dorbene, 1mg kg<sup>-1</sup>) and

936 Midazolam (Dormicum, 5mg kg<sup>-1</sup>) in sterile NaCl 0.9% (MM-mix). All whiskers were  
937 deflected (10min, 8Hz) using a piezoelectric ceramic actuator (PL-series PICMA, Physik  
938 Intrumente). A perforated plastic plate was attached to the ceramic plate, through which all  
939 whiskers were inserted. The plate remained 4mm away from the skin. The voltage applied  
940 to the actuator was set to evoke a whisker displacement of 0.6mm with a ramp of 7-8ms.  
941 After whisker stimulation, the mouse was immediately decapitated, which was followed by  
942 thalamocortical slice preparation, and RPS.

943

#### 944 *Immunohistochemistry*

945 For immunohistochemical detection and quantification of VIP and SST interneurons, after  
946 electrophysiology, mouse thalamocortical brain sections were fixed in 4% PFA (pH 7.4) for  
947 18-24 hours. Slices were then incubated for 1 hour, free floating in a blocking solution of  
948 PBS (pH 7.4) containing 0.025% Triton and 5% Bovine Serum Albumin (BSA). After  
949 blocking, slices were incubated for 18-24 hours in blocking solution containing primary  
950 antibodies (VIP, rabbit polyclonal IgG; SST, rat IgG2b) at a 1:500 dilution (Lee et al.,  
951 2013). After incubation in primary antibodies, slices were washed 4 times for 10 minutes in  
952 PBS plus 5% BSA at room temperature. They were then incubated for 2 hours in PBS  
953 solution containing 5% BSA and the appropriate fluorescence-conjugated secondary  
954 antibodies (1:400). After incubation with secondary antibodies, slices were washed 4 times  
955 in PBS at room temperature and placed onto glass slides.

956

#### 957 **Quantification and Statistical Analysis**

##### 958 *ChR2 and hM4Di expression analysis*

959 The VPM and POM are juxtaposed to each other in the thalamus and to control for any spill  
960 over of virus into the VPM a post-hoc analysis of the BC was performed. Fluorescent  
961 images (10x objective) were taken of slices, PFA-fixed immediately after the ephys  
962 recordings. Fluorescence was observed in L1 (from the pia 0-200µm staining) and L5 (600-  
963 800µm) in all experimental slices. An intensity measurement was performed across the BC.  
964 Slices with an intensity measurement of more than  $3 \times 10^4$  a.u. in L4 (400-600µm) were  
965 deemed to have spill-over of AAV in the VPM, and were eliminated from any further LTP  
966 analysis.

967

968 To estimate the extent of hM4Di-expression, (**Supplementary Figure 3**) visibly positive  
969 cells were counted, and expressed as the total number in 100µm increments from the pia,

970 as well as the number within a layer (**Supplementary Figure 3**), as described<sup>48</sup>. Layers  
971 were determined from their distance from the pia.

972

### 973 *Confocal microscopy and immunohistochemical analysis*

974 Images were generated using a confocal laser-scanning fluorescence microscope at 40x  
975 magnification fluorescence intensity was measured by delineating the edges of all visible  
976 cells using ImageJ software and by calculating mean fluorescence in these regions of  
977 interest (ROI).

978

979 To avoid counting false-positives, two controls were performed. First, images were taken in  
980 an area adjacent to injection area (i.e., cells that were not visibly expressing hM4Di-  
981 mCherry; **Supplementary Figure 3**). ROIs were drawn around anti-SST or anti-VIP  
982 positive cells, and fluorescence intensity in the red channel was quantified (green data  
983 points in **Supplementary Figure 3**). Next, images were taken of the injection area in  
984 sections on which only the secondary antibody Alexa 647 was applied. ROIs were drawn  
985 around hM4Di-mCherry-positive cells, and fluorescence intensity in the green channel was  
986 quantified (red data points in **Supplementary Figure 3**). Each of these quantifications  
987 yielded a mean fluorescence  $\pm$  2SD, which was subsequently used as the lower-limit on  
988 which we based the overlap estimate (i.e.  $\#true\ positives/\#total$ ). Intensities of the  
989 experimental cells (yellow data points in **Supplementary Figure 3**.) below these limits  
990 were considered as false positive in either channel.

991

### 992 *Data analysis*

993 All relevant raw data are available from the authors. Electrophysiological data were  
994 acquired using a Multiclamp 700B Amplifier (Molecular Devices) using Matlab-based Ephys  
995 software. The data were Bessel-filtered during the recording at 10 kHz. Offline analysis was  
996 performed using Event Detection/Template Matching tools in Clampfit 10 software.  
997 Templates were created by extracting and averaging segments of data that were manually  
998 identified as corresponding to an event within 5ms of ES and/or OS. The same template  
999 was used for all depolarizing PSPs and another was adopted for hyperpolarizing PSPs. In  
1000 Event Detection/Template Matching, the template is slid along the data trace one point at a  
1001 time and scaled and offset to optimally fit the data at each point. Optimization of the fit was  
1002 found by minimizing the sum of the squared errors between the fitted template and the  
1003 data. Since background noise rarely exceeded four times the standard deviation of the

1004 noise this was used for optimum template matching. If the event detection program found  
1005 an event within the corresponding window following stimulation, the event was manually  
1006 accepted and the program would calculate the peak amplitude. Data points were removed  
1007 on the bases of a significant change in Rs throughout the experiment and if post-hoc viral  
1008 transfection was not specific. Randomization and blinding methods were not used. Data is  
1009 presented throughout as mean  $\pm$ SEM unless otherwise stated.

1010

1011 Paired stimulation synaptic conductances were determined using published methods in  
1012 voltage clamp using PS postsynaptic currents (PSCs) recorded at 4 different holding  
1013 potentials (-70, -50, -30, and 0mV; 5 PSCs per V; 0.1 Hz) (House et al., 2011; Monier et  
1014 al., 2008; Gambino and Holtmaat, 2012). The relationship between the synaptic current  
1015 ( $I_{syn}$ ) and synaptic conductance ( $G_{syn}$ ) were given by the following equation:

$$1016 \quad I_{syn}(t) = G_{syn}(t) * (V_c(t) / E_{rev}(t)),$$

1017 Where  $E_{rev}$  and  $V_c$  are the synaptic reversal and holding potential, respectively. For each  
1018 time point,  $G_{syn}$  and  $E_{rev}$  are provided by the slope and the x-intercept of the linear  
1019 regression fit of the I-V curve, respectively. The inhibitory ( $G_i$ ) conductance was calculated  
1020 using the following equation:

$$1021 \quad G_i(t) = (G_{syn}(t) * (E_e - E_{rev}(t))) / (E_e - E_i),$$

1022 Where  $E_e$  and  $E_i$  are the excitatory and inhibitory reversal potential respectively. They were  
1023 estimated to be -84mV and 0mV, respectively, based on the Nernst Equation, with a 32°C  
1024 bath temperature, and the internal and external patch solution ion concentrations.

1025

### 1026 *Statistical Analysis*

1027 For all experiments, n equals the number of cells (no more than 3 cells per mouse per  
1028 experiment). For immunohistochemical experiments, 3 slices were used from each mouse.  
1029 All statistical analysis was performed and graphs were created using Prism 7. Unless  
1030 stated otherwise, a Student's t-test was used for statistical comparisons. For analysis of  
1031 data with unequal variances (as determined by a post-hoc F-test), a Mann-Whitney U test  
1032 was used. For analysis of pre versus post comparisons a paired Student's t-test was  
1033 performed. For comparisons over time a Two-way repeated, analysis of variance (ANOVA)  
1034 was utilized followed by a post-hoc, Bonferroni's multiple comparisons test. For  
1035 comparisons of the V-I curves linear regressions were performed and an Analysis of  
1036 Covariance (ANCOVA) to compare slopes (Figure 4I). Results were considered statistically



1037 significant when the P-value < 0.05. No statistical methods were used to estimate sample  
1038 size.  $\beta$ -power values were calculated and are provided in the Supplementary Information.  
1039

Figure 1

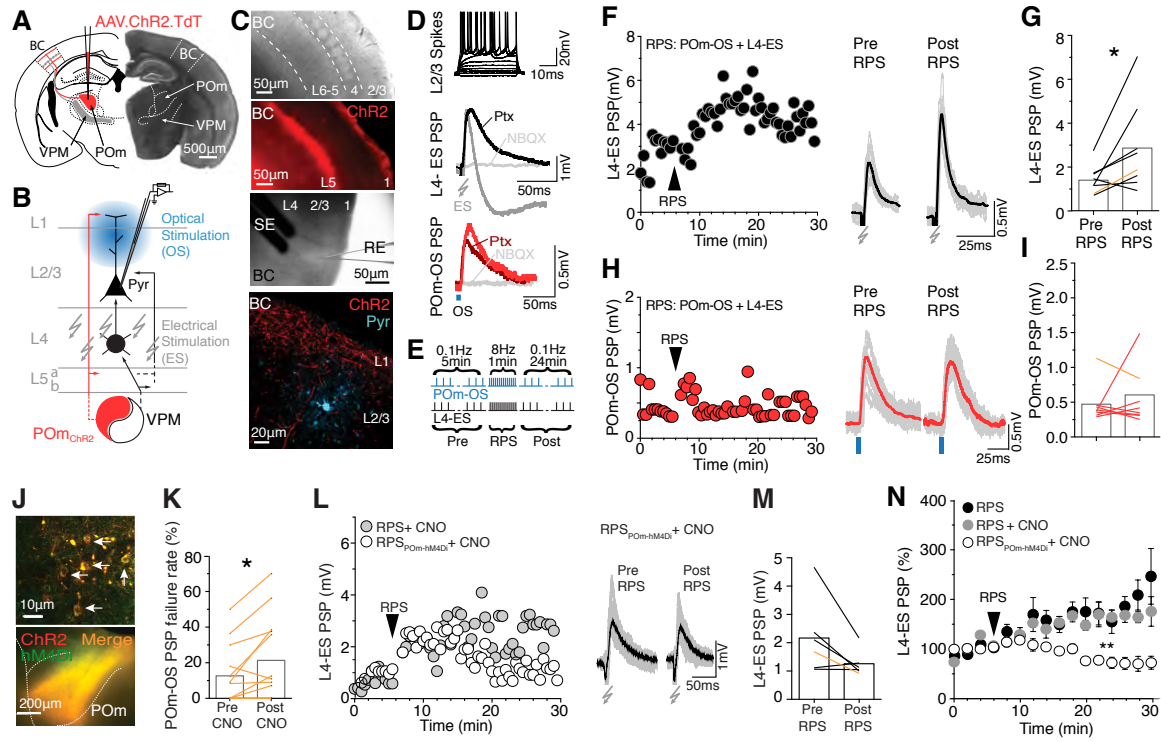

Figure 1

Figure 2

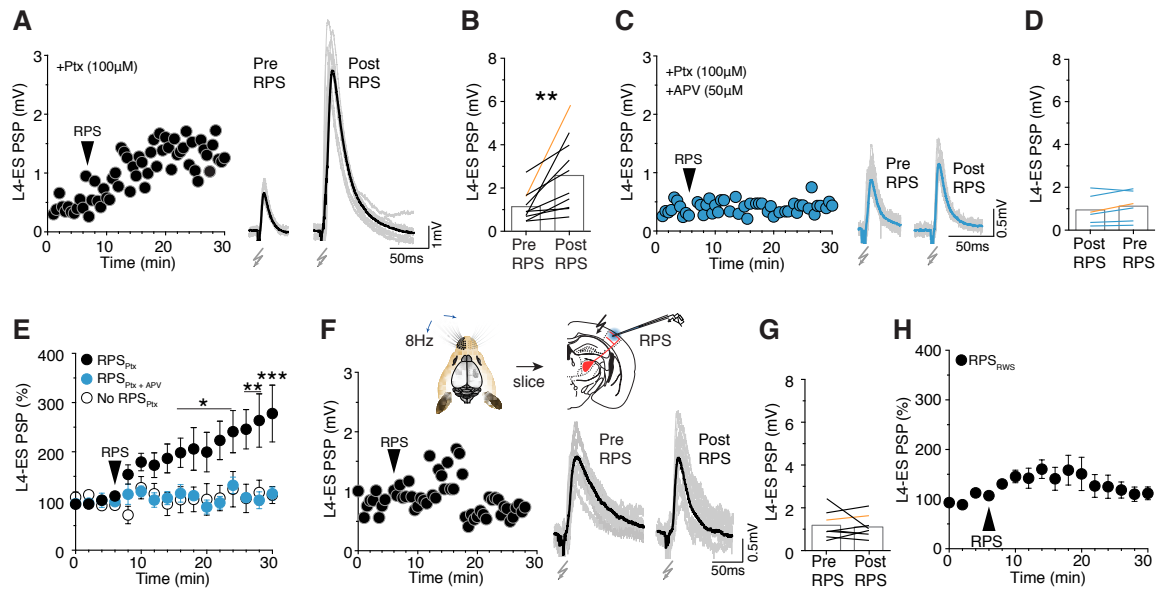

Figure 2

Figure 3

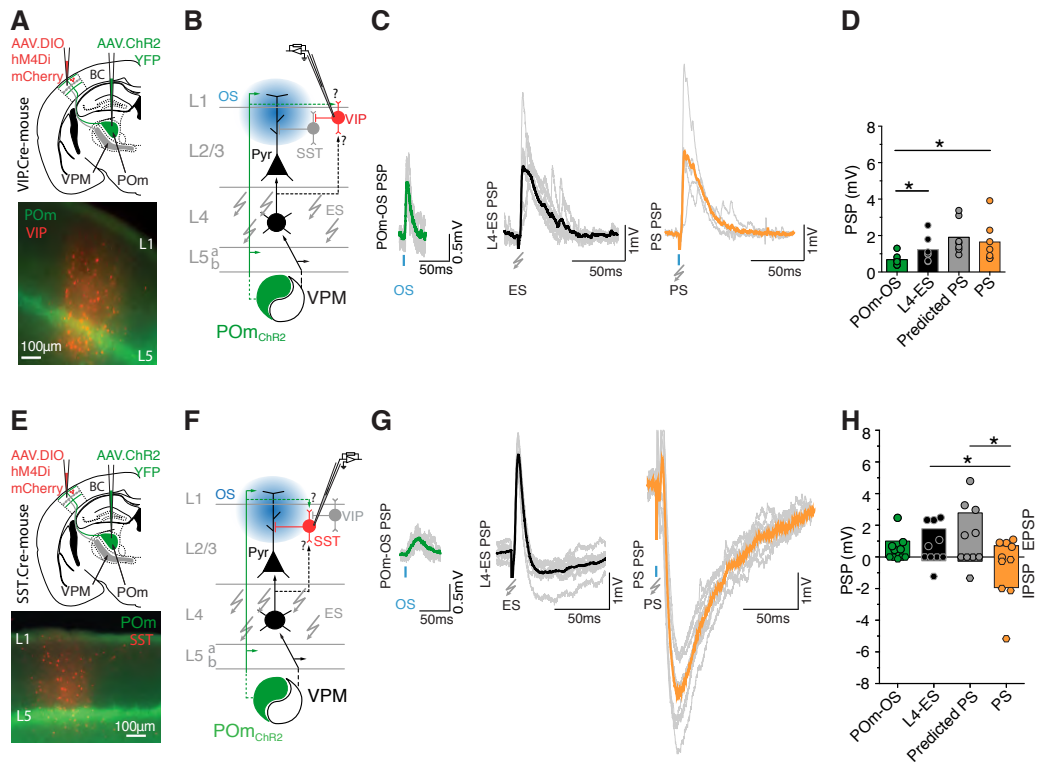

Figure 3

Figure 4

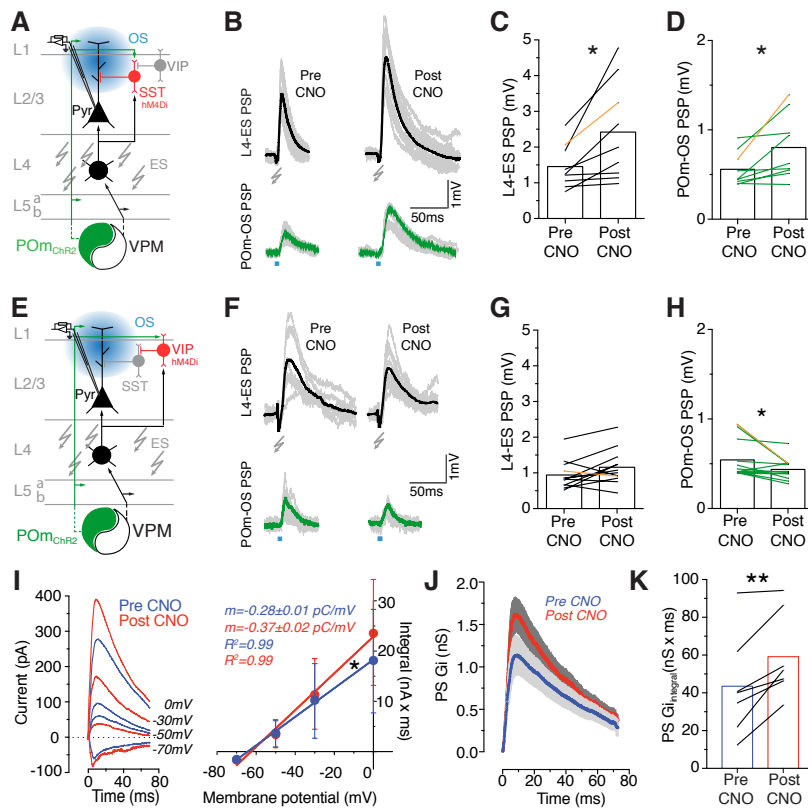

Figure 4

Figure 5

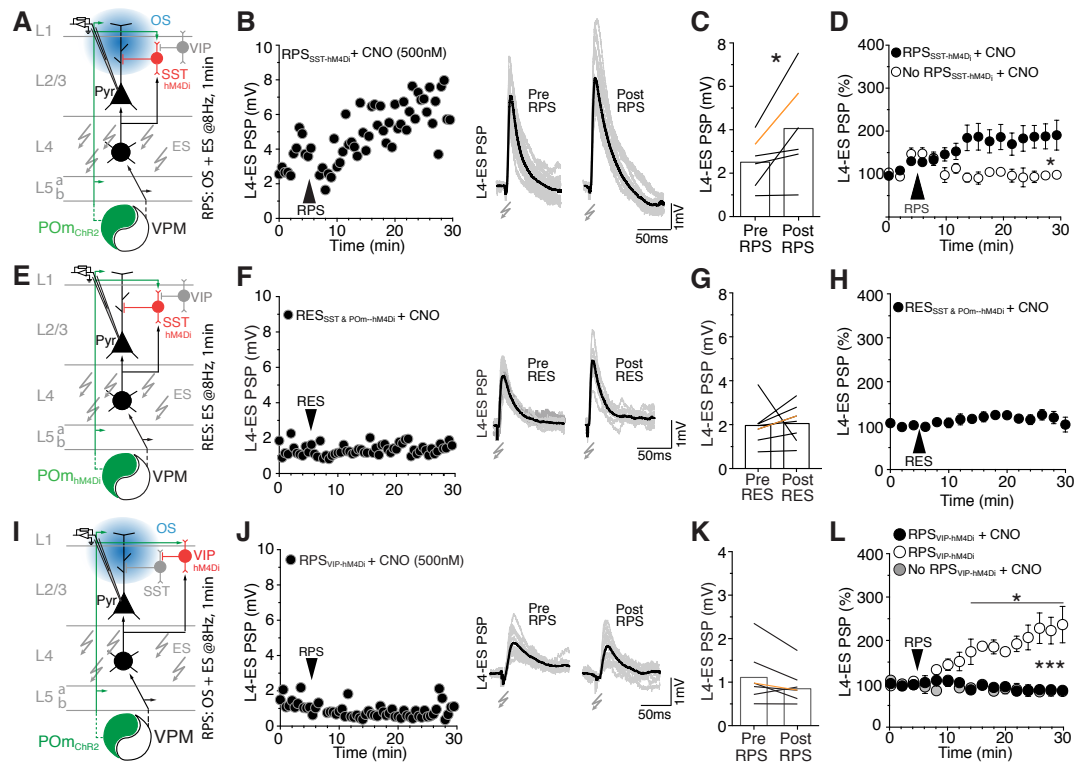

Figure 5

Supplemental Figure 1

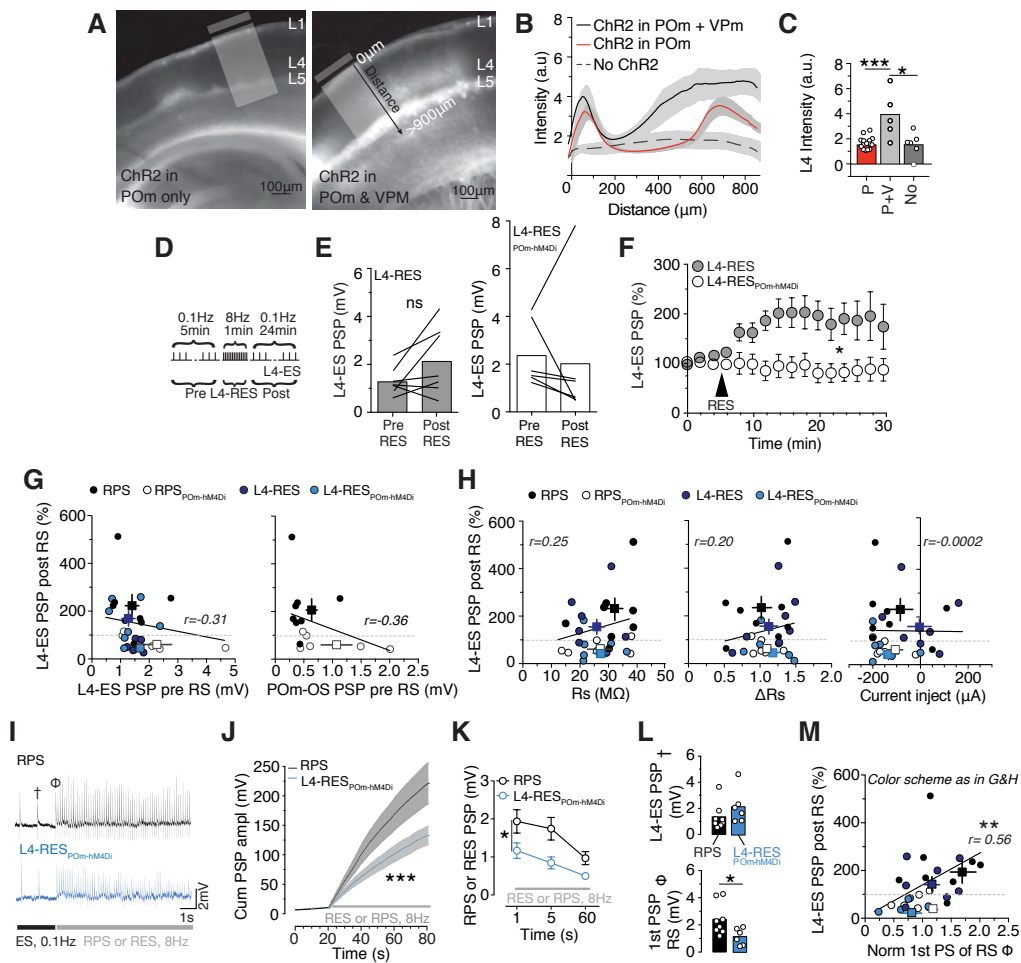

Supplemental Figure 1

Supplemental Figure 2

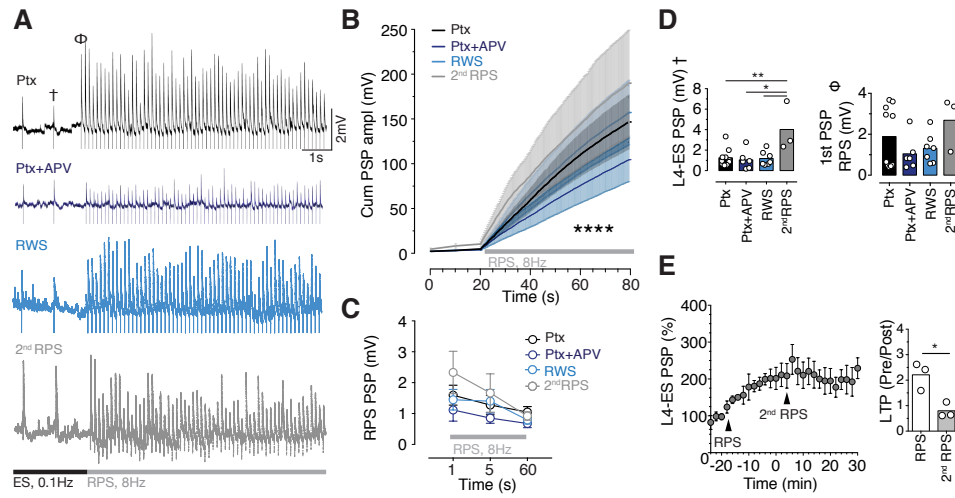

Supplementary Figure 2



Supplemental Figure 3

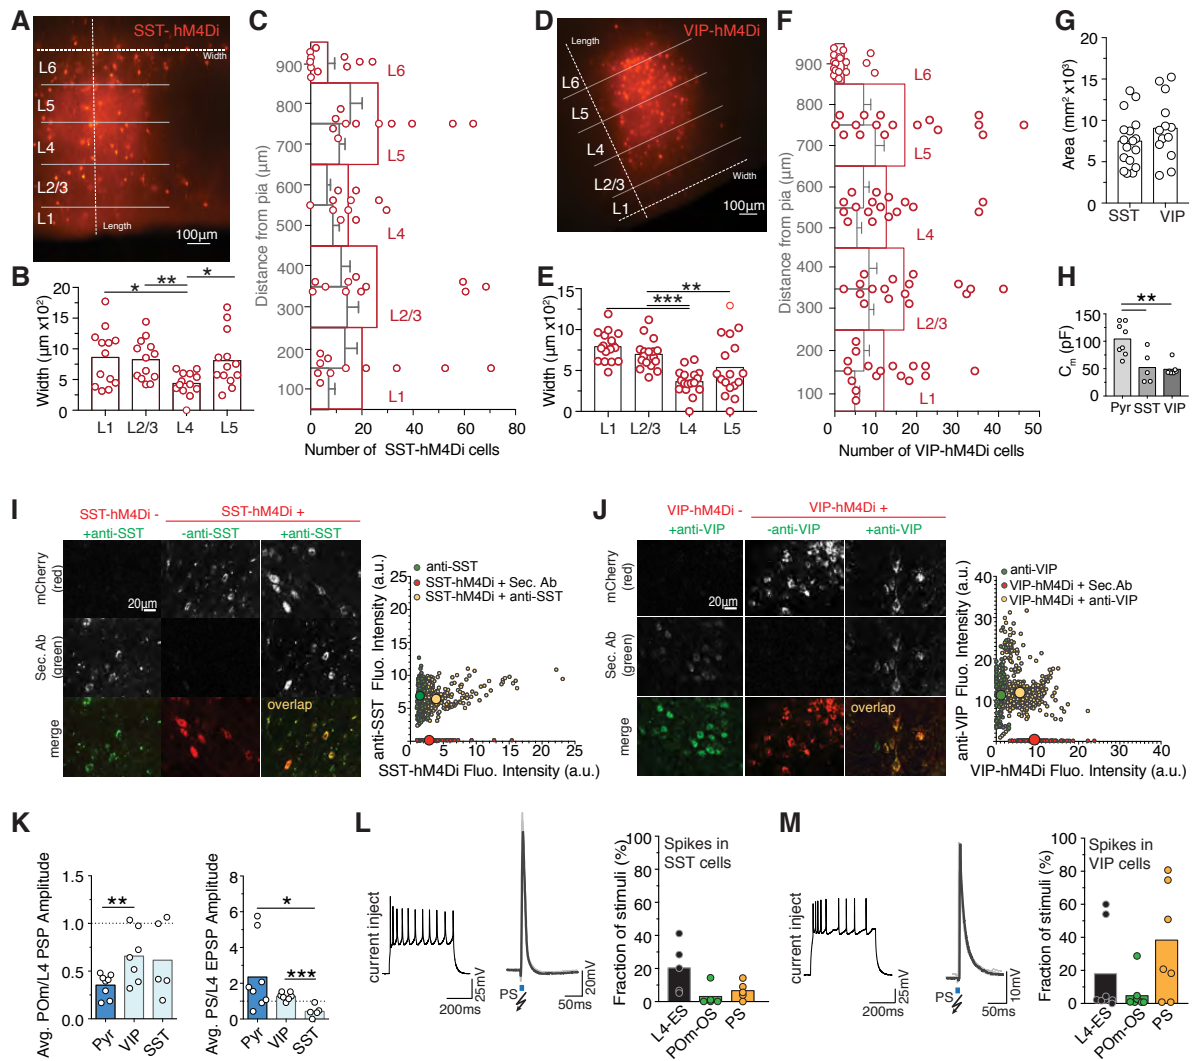

Supplemental Figure 3

Supplemental Figure 4

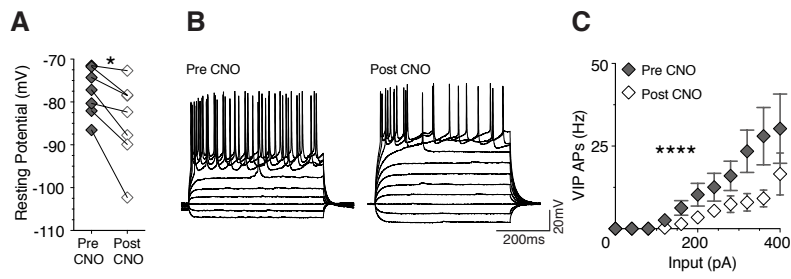

Supplementary Figure 4

Supplemental Figure 5

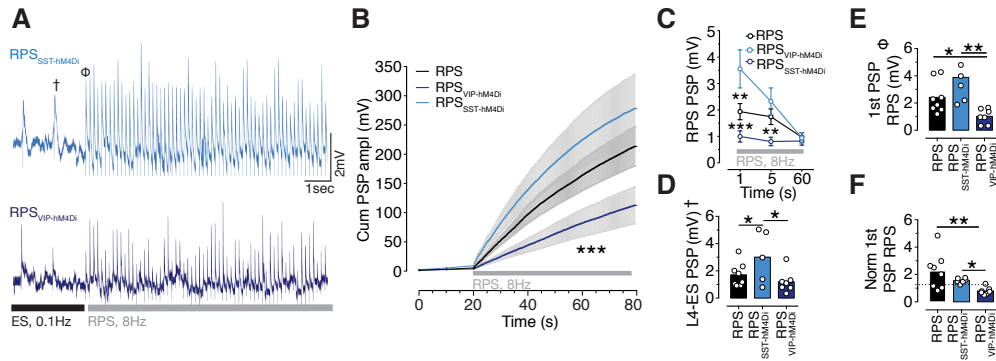

Supplementary Figure 5

Supplemental Table

**Supplementary Values and Statistics**

**Figure 1G:** Mean L4-ES PSP<sub>Pyr</sub> amplitude pre (1.41±0.24mV) vs. post (2.87±0.72mV) RPS; n=8 cells;  $P=0.0426$ ; paired Student's t-test ( $\beta=0.57$ ).

**Figure 1I:** Mean POM-OS PSP<sub>Pyr</sub> amplitude before pre (0.47±0.1mV) vs. post (0.56±0.15 mV) RPS; n=8 cells;  $P=0.566$ ; paired Student's t-test ( $\beta=0.082$ ).

**Figure 1J:** Mean L4-ES PSP<sub>Pyr</sub> amplitude pre (2.17±0.54mV) vs. post (1.26±0.22mV) RPS; n=6 cells;  $P=0.0709$ ; paired Student's t-test ( $\beta=0.06$ ).

**Figure 1K:** POM-OS PSP failure rate (%) pre CNO (12.64±4.58%) vs. post CNO (21.36±6.56%); n=13;  $P=0.016$ ; paired Student's t-test ( $\beta=0.72$ ).

**Figure 1M:** Mean L4-ES PSP amplitudes, pre (2.17±0.54mV) vs. post (1.26±0.19mV) RPS<sub>POM-hM4Di</sub> + CNO; n=6;  $P=0.07$ ; paired Student's t-test ( $\beta=0.46$ ).

**Figure 1N:** Normalized L4-ES PSP amplitudes after RPS under various conditions. RPS+CNO vs. RPS<sub>POM-hM4Di</sub>+CNO fails to elicit LT;  $P=0.01$ . RPS vs. RPS+CNO  $P=0.76$ ; two-way repeated measures ANOVA.

**Figure 2B:** Mean L4-ES PSP<sub>Pyr</sub> amplitude pre (1.14±0.64mV) vs. post (2.87±0.72mV) RPS<sub>Ptx</sub>; n=10 cells;  $P=0.0088$ ; paired Student's t-test ( $\beta=0.93$ ).

**Figure 2D:** Mean L4-ES PSP<sub>Pyr</sub> amplitude pre (0.95±0.70 mV) vs. post (1.12±0.70mV) RPS<sub>Ptx, APV</sub>; n=6 cells;  $P=0.113$ ; paired Student's t-test ( $\beta=0.35$ ).

**Figure 2E:** Normalized L4-ES PSP amplitude (%), 2 min bins, RPS<sub>Ptx</sub> vs. RPS<sub>Ptx, APV</sub> vs. No RPS<sub>Ptx</sub> n=5 cells,  $P=0.0351$ ; Two-way repeated measures ANOVA. Post-hoc, Bonferroni's multiple comparisons test, from 22mins: RPS<sub>Ptx</sub> vs. RPS<sub>Ptx, APV</sub>  $P>0.021$ ; RPS<sub>Ptx</sub> vs. No RPS<sub>Ptx</sub>,  $P>0.02$ ; RPS<sub>Ptx, APV</sub> vs. No RPS<sub>Ptx</sub>,  $P>0.9999$ .

**Figure 2G:** Mean L4-ES PSP amplitude RPS<sub>RWS</sub> pre (0.95±0.70mV) vs. post (1.12±0.70mV); n=7 cells;  $P=0.7503$ ; paired Student's t-test ( $\beta=0.42$ ).

**Figure 2H:** Normalized L4-ES PSP amplitude (%), 2min bins, for RPS<sub>RWS</sub>.

**Figure 3D:** Mean PSP amplitudes in VIP interneurons comparing L4 (1.23±0.27mV) vs. POM (0.68±0.12mV), n=7 cells,  $P=0.04$  ( $\beta=0.58$ ); POM (0.68±0.12mV) vs. PS (1.65±0.43mV), n=7 cells,  $P=0.04$  ( $\beta=0.59$ ); PS vs. L4, n=7 cells,  $P=0.06$  ( $\beta=0.60$ ); POM vs. Predicted PS (1.9±0.36mV),  $P=0.004$  ( $\beta=0.96$ ); L4 vs. Predicted PS,  $P=0.001$  ( $\beta=0.99$ ); PS vs. Predicted PS, n=7 cells,  $P=0.17$  ( $\beta=0.26$ ); paired Student's t-tests.

**Figure 3H:** Mean PSP<sub>SST</sub> amplitudes comparing L4 (1.78±0.37mV) vs. PS (0.70±0.19mV), n=5 cells,  $P=0.013$  ( $\beta=0.83$ ); PS vs. Predicted PS (2.78±0.63mV), n=5 cells,  $P=0.01$  ( $\beta=0.88$ ); PS vs. POM (1.00±0.38mV), n=5 cells,  $P=0.37$  ( $\beta=0.26$ ); Predicted PS vs. L4, n=5 cells,  $P=0.0563$  ( $\beta=0.52$ ); Predicted PS vs. POM, n=5 cells,  $P=0.0089$  ( $\beta=0.52$ ); paired Student's t-tests.

**Figure 4C:** Mean L4-ES PSP<sub>Pyr</sub> amplitude pre CNO (1.46±0.20mV) vs. post (2.42±0.46 mV); n=9 cells;  $P=0.0135$ ; paired Student's t-test ( $\beta=0.79$ ).

**Figure 4D:** Mean POM-OS PSP<sub>Pyr</sub> amplitude pre CNO (0.56±0.063mV) vs. post (0.80±0.135); n=9 cells;  $P=0.0224$ ; paired Student's t-test ( $\beta=0.70$ ).

**Figure 4G:** Mean L4-ES PSP<sub>Pyr</sub> amplitude pre CNO (0.94±0.12mV) vs. post (1.16±0.14mV); n=12 cells;  $P=0.0639$ ; paired Student's t-test ( $\beta=0.47$ ).

**Figure 4H:** Mean P<sub>Om</sub>-OS PSP<sub>Pyr</sub> amplitude pre CNO ( $0.54 \pm 0.06$  mV) vs. post ( $0.44 \pm 0.04$  mV); n=9 cells;  $P=0.0445$ ; paired Student's t-test ( $\beta=0.54$ ).

**Figure 4I:** Slopes pre ( $-0.28 \pm 0.01$  pC/mV) vs. post CNO ( $-0.37 \pm 0.02$  pC/mV), n=7,  $P=0.0365$ , an Analysis of Covariance (ANCOVA).

**Figure 4K:** Mean pre CNO ( $43.53 \pm 10.12$  nS) vs. post CNO ( $59.14 \pm 8.466$  nS), n=7 cells,  $P=0.0064$ , paired Student's t-test ( $\beta=0.92$ ).

**Figure 5C:** Mean L4-ES PSP amplitude pre RPS<sub>SST-hM4Di</sub> ( $2.51 \pm 0.48$  mV) vs. post ( $4.06 \pm 0.94$  mV); n=6 cells,  $P=0.0478$ ; paired Student's t-test (0.56).

**Figure 5d:** Normalized L4-ES PSP<sub>Pyr</sub> peak amplitude (%), 2 min bins, comparing RPS<sub>SST-hM4Di</sub> + CNO, n=6 cells, vs. No RPS<sub>SST-hM4Di</sub> + CNO, n=4 cells,  $P=0.0493$ ; Two-way repeated measures ANOVA.

**Figure 5G:** Mean L4-ES PSP amplitudes pre ( $1.96 \pm 0.36$  mV) vs. post ( $2.053 \pm 0.33$  mV). RES<sub>SST&P<sub>Om</sub>-hM4Di</sub>, n=7 cells,  $P=0.8477$ ; paired Student's t-test ( $\beta=0.05$ ).

**Figure 5K:** Mean L4-ES PSP amplitude pre RPS<sub>VIP-hM4Di</sub> ( $1.13 \pm 0.23$  mV) vs. post ( $0.92 \pm 0.15$  mV), n=7 cells;  $P=0.0824$ ; paired Student's t-test ( $\beta=0.42$ ).

**Figure 5L:** Normalized L4-ES PSP amplitude (%), 2 min bins, comparing RPS<sub>VIP-hM4Di</sub>+ CNO vs. No RPS<sub>VIP-hM4Di</sub> (n=5 cells) + CNO vs. RPS<sub>VIP-hM4Di</sub> (n=3 cells),  $P<0.0001$ , Two-Way repeated measures ANOVA. Post-hoc Bonferroni's multiple comparisons test, from 12 min: RPS<sub>VIP-hM4Di</sub>+ CNO vs. No RPS<sub>VIP-hM4Di</sub>,  $P>0.9999$ ; RPS<sub>VIP-hM4Di</sub>+ CNO vs. RPS<sub>VIP-hM4Di</sub>,  $P<0.0295$ ; No RPS<sub>VIP-hM4Di</sub> vs. RPS<sub>VIP-hM4Di</sub>,  $P<0.0073$ .

## Supplemental Text and Figures

### HIGHLIGHTS

- Higher-order (HO) thalamocortical inputs aid intracortical synaptic plasticity
- HO thalamic inputs increase VIP and decrease SST interneuron activity
- The activation of VIP interneurons disinhibits L2/3 pyramidal neurons
- This novel HO-to-VIP disinhibitory motif gates intracortical synaptic plasticity

### eTOC Blurb

- Using *ex vivo* patch-clamp recordings, optogenetics, and chemogenetics Williams and Holtmaat dissect the circuits underlying sensory-driven LTP in cortex *in vivo*. This reveals a novel circuit motif in which higher-order thalamocortical input gates plasticity of intracortical synapses via VIP-mediated disinhibition.

## Supplemental Text and Figures

### CELL PRESS DECLARATION OF INTERESTS POLICY

Transparency is essential for a reader's trust in the scientific process and for the credibility of published articles. At Cell Press, we feel that disclosure of competing interests is a critical aspect of transparency. Therefore, we ask that all authors disclose any financial or other interests related to the submitted work that (1) could affect or have the perception of affecting the author's objectivity, or (2) could influence or have the perception of influencing the content of the article, in a "Declaration of Interests" section.

#### **What types of articles does this apply to?**

We ask that you disclose competing interests for all submitted content, including research articles as well as front matter (e.g., Reviews, Previews, etc.) by completing and submitting the "Declaration of Interests" form below. We also ask that you include a "Declaration of Interests" section in the text of all research articles even if there are no interests declared. For front matter, we ask you to include a "Declaration of Interests" section only when you have information to declare.

#### **What should I disclose?**

We ask that you and all authors disclose any personal financial interests (examples include stocks or shares in companies with interests related to the submitted work or consulting fees from companies that could have interests related to the work), professional affiliations, advisory positions, board memberships, or patent holdings that are related to the subject matter of the contribution. As a guideline, you need to declare an interest for (1) any affiliation associated with a payment or financial benefit exceeding \$10,000 p.a. or 5% ownership of a company or (2) research funding by a company with related interests. You do not need to disclose diversified mutual funds, 401ks, or investment trusts.

#### **Where do I declare competing interests?**

Competing interests should be disclosed on the "Declaration of Interests" form as well as in the last section of the manuscript before the "References" section, under the heading "Declaration of Interests". This section should include financial or other competing interests as well as affiliations that are not included in the author list.

Examples of "Declaration of Interests" language include:

"AUTHOR is an employee and shareholder of COMPANY."

"AUTHOR is a founder of COMPANY and a member of its scientific advisory board."

*NOTE:* Primary affiliations should be included on the title page of the manuscript with the author list and do not need to be included in the "Declaration of Interests" section. Funding sources should be included in the "Acknowledgments" section and also do not need to be included in the "Declaration of Interests" section. (A small number of front-matter article types do not include an "Acknowledgments" section. For these articles, reporting of funding sources is not required.)

#### **What if there are no competing interests to declare?**

For *research* articles, if you have no competing interests to declare, please note that in a "Declaration of Interests" section with the following wording:

"The authors declare no competing interests."

*Front-matter* articles do not need to include this section when there are no competing interests to declare.

## CELL PRESS DECLARATION OF INTERESTS FORM

If submitting materials via Editorial Manager, please complete this form and upload with your final submission. Otherwise, please e-mail as an attachment to the editor handling your manuscript.

***Please complete each section of the form and insert any necessary “Declaration of Interest” statement in the text box at the end of the form. A matching statement should be included in a “Declaration of Interest” section in the manuscript.***

### **Institutional Affiliations**

We ask that you list the current institutional affiliations of all authors, including academic, corporate, and industrial, on the title page of the manuscript. ***Please select one of the following:***

- All affiliations are listed on the title page of the manuscript.
- I or other authors have additional affiliations that we have noted in the “Declaration of Interests” section of the manuscript and on this form below.

### **Funding Sources**

We ask that you disclose all funding sources for the research described in this work. ***Please confirm the following:***

- All funding sources for this study are listed in the “Acknowledgments” section of the manuscript.\*

\*A small number of front-matter article types do not include an “Acknowledgments” section. For these, reporting funding sources is not required.

### **Competing Financial Interests**

We ask that authors disclose any financial interests, including financial holdings, professional affiliations, advisory positions, board memberships, receipt of consulting fees etc., that:

- (1) could affect or have the perception of affecting the author’s objectivity, *or*
- (2) could influence or have the perception of influencing the content of the article.

***Please select one of the following:***

- The authors have no financial interests to declare.
- I or other authors have noted any financial interests in the “Declaration of Interests” section of the manuscript and on this form below.



**Advisory/Management and Consulting Positions**

We ask that authors disclose any position, be it a member of a Board or Advisory Committee or a paid consultant, that they have been involved with that is related to this study. **Please select one of the following:**

- The authors have no positions to declare.
- I or other authors have management/advisory or consulting relationships noted in the “Declaration of Interests” section of the manuscript and on this form below.

**Patents**

We ask that you disclose any patents related to this work by any of the authors or their institutions. **Please select one of the following:**

- The authors have no related patents to declare.
- I or one of my authors have a patent related to this work, which is noted in the “Declaration of Interests” section of the manuscript and on this form below. Please include patent number(s).

**Please insert any “Declaration of Interests” statement in this space.** This exact text should also be included in the “Declaration of Interests” section of the manuscript. If no authors have a competing interest, please insert the text, “The authors declare no competing interests.”

**On behalf of all authors, I declare that I have disclosed all competing interests related to this work. If any exist, they have been included in the “Declaration of Interests” section of the manuscript.**

Name: Anthony Holtmaat

Manuscript  
Number (if  
available):
